# Supplementary material for: Recording γ-secretase activity in living mouse brains
Source: eLife. 2024 Oct 3;13:RP96848. doi: 10.7554/eLife.96848 (PMC11449482; doi:10.7554/eLife.96848)
Supplement: Figure 2—figure supplement 1—source data 1. [file elife-96848-fig2-figsupp1-data1.xlsx]

## Sheet: Fig 2—fig sup 1B
C1 intensity	C2 intensity
2410.97	2393.83
2137.98	2239.26
1715.52	1565.82
1678.07	1563.15
2032.22	2229.15
1953.44	1862.27
3243.27	3204.23
3525.55	3717.56
1529.56	1263.84
2117.32	2175.78
3028.6	2910.36
2321.85	1786.97
2669.6	2182.86
3381.21	3287.14
2691.4	2574.2
1948.56	1346.84
1858.31	1969.91
1884.2	969.278
3602.38	3420.43
3892.15	3885.04
3477.48	3104.22
2411.24	1922.79
2845.17	2502.96
3206.25	3171.37
3357.12	3414.01
1856.91	1233.33
3473.2	3078.23
3112.2	3077.05
2713.85	2194.18
3048.91	3105.12
1857.09	889.098
3513.81	3622.6
3420.69	3255.54
3488.27	3652.2
2404.96	2765.49
3545.35	3728.6
2399.25	2554.38
2137.45	2524.89
2248.01	2238.88
2303.54	1890.94
3044.77	3343.58
3471.05	3546.63
2166.27	2383.13
1904.19	1422.14
1831.6	2113.29
3165.15	3234.53
2449.17	2297.3
2447.06	2799.67
2553.77	2683.95
3201.29	3480.7
2692.64	2823.03
3143.26	2780.87
3098.23	2686.43
3946.82	3640.12
3941.93	3938.7
3045.81	3464.99
3123.92	1788.61
2864.9	2726.86
2814.12	2895.18
2411.11	2390.76
3477.74	3694.91
3897.99	4021.53
3512.82	3776.97
2647.9	2752.64
2787.36	1924.98
3979.73	3992.82
3122.11	3317.59
2840.94	3081.62
2284.32	2463.9
1119.17	1333.54
3547.99	3769.54
3694.22	3824.1
1479.66	1670.3
1067.99	1260.55
2624.14	1288.29
1311.1	1585.68
2035.05	2228.42
3071.16	3149.19
3067.06	3132.61
2579.19	2965.43
2199.85	2521.9
3720.54	3775.99
3444.57	3775.65
2596.81	2900.89
2049.24	2060.34
2221.44	2629.2
3255.21	3430
3817.88	3718.84
1472.15	757.47
3614.61	3661.54
1462.93	1541.75
1834.4	887.367
2780.09	2977.38
2155.11	1535.1
1244	1354.79
1924.7	1042.99
2917.73	3013.61
1702.62	821.045
3062.73	2229.75
3817.36	1208.31
2878.94	3058
3590.99	3796.37
1085.78	1338.43
2294.72	977.411
3796.21	3902.63
2961.21	2903.5
1679.74	1087.59
3494.16	3284.19
1438.93	831.164
2612.71	2454.85
3356.55	3536.92
2479.39	2281.27
3754.07	3873.94
4009.7	4067.19
2471.2	2901.54
3447.88	3681.9
1128.98	1361.76
2211.81	2517.35
1703.45	858.303
1908.09	1070.82
3245.86	2907.35
3481.57	3478.85
1675.73	1106.27
2916.7	1333.8
3068.61	3322.44
3648.71	3675.29
1789.83	985.693
1829.39	875.345
2854.41	3076.28
3261.48	3193.98
3930.59	3810.08
3470.34	3228.31
2875.08	2185.59
1476.79	868.805
1827.19	782.964
2662.3	903.817
2895.29	2846.58
3312.97	1327.77
3715.02	3656.76
1849.35	1272.2
1161.66	1264.9
1711.51	1970.75
3406.56	1062.7
2929.41	1159.17
3649.92	1067.61
2644.95	976.422
3640.92	983.677
2133.34	815.833
3523.51	3733.43
2533.74	2669.86
2172	2308.27
3633.45	3605.17
2175.09	2401.4
2061.99	967.459
3902.36	3897.37
2870.3	3342.8
3457.77	3657.92
3555.02	3479.19
3523.8	3481.1
2121.9	856.218
2457.22	887.727
2917.1	3174.66
3603.17	3592.04
2369.27	762.053
2636.93	993.775
1698.64	1135.18
2443.24	2799.14
2845.46	2772.8
1956.35	1089.88
1913.16	2208.97
2593.79	2701.52
2904.24	2705.94
2099.3	2238.44
2379.03	2825.69
1447.1	1635.73
2761.72	1062.78
3323.74	3008.05
2387.49	849.455
2484.09	1906.02
2912.2	3311.42
3676.05	1893.85
3015.42	2971.74
1702.47	1819.52
2819.09	3186.07
3552.86	3646.11
3572.71	3706.61
3867.25	3869.38
3634.41	3601.24
1858.33	2114.94
3954.86	3970.27
2134.24	1375.38
2864.09	951.825
3662.22	3883.65
2516.21	1355.78
2808.09	1083.87
3768.63	3730.88
3055.45	3264.22
2649.55	1016.65
1673.77	811.336
2614.26	950
3609.98	3773.89
3217.8	2905.67
2267.51	814.854
1983.07	761.801
1544.63	769.432
1654.01	905.664
3967.47	3863.66
2168.69	2408.06
3338.39	3563.64
2287.97	2712.63
1845.1	773.011
1804.09	828.339
2729.03	2938.98
2623.51	1441.63
2486.6	891.336
2557.01	1631.1
2495.36	1499.7
3924.17	4001.78
3772.72	3434.28
2305.43	2370.44
2428.42	1016.77
3633.46	3695.33
3194.31	3270.61
3193.5	935.481
2331.54	2592.15
2842.6	1044.72
2747.07	1198.8
3878.33	1597.43
3240.5	3311.6
3644.9	3709.49
3633.23	3674.63
3797.05	3735.13
2293.74	1079.44
4052.63	1195.52
3845.95	3676.19
2580.04	1517.08
3750.78	1213.05
2960.98	1304.88
2935.84	2051.06
2368.99	946.944
2593.8	877.788
3537.14	3719.48
1115.37	1307.59
3064.65	1071.22
2975.41	3310.61
2693.32	3100.61
1899.36	776.055
3771.05	3854.51
2973.34	3362.67
3287.71	3514.24
2805.75	1884.64
3051.07	2799.08
2752.9	1998.12
3088.16	2704.75
3223.89	2660.61
3284.5	3405.01
4015.62	1327.26
2356.5	982.976
3418.03	2159.03
2686.51	1307.89
3204.85	3520.96
2245.67	2370.9
2242.53	2629.55
3691.93	3843.23
2218.58	847.006
3939.91	3909.36
3559.53	3704.81
1686.66	1862.85
3945.72	1311.56
3418.21	3475.21
3353.69	3126.34
3145.94	2457.62
2857.5	3127.64
2648.05	1906.25
2641.59	2885.34
3415.46	3509.65
3407.68	3415.92
2847.59	2333.42
3924.13	1181.14
2837.49	2814.36
2673.51	1028.07
2476.81	1195.26
2381.72	813.805
2485.39	875.561
4024.98	4030.43
3914.93	1351.77
2276.35	2647.21
3573.21	1089.64
2448.93	1184.63
3283.07	2644.37
3461.94	3658.38
2430.4	886.588
2863.4	931.915
2085.64	2042.43
2118.29	1151.49
2483.04	970.568
3580.35	3217.61
2007.08	2315.17
2951.78	3213.84
1916.07	774.422
2861	2827.08
2571.1	2521.78
2854.24	955.153
3857.32	1306.28
2572.06	1003.76
2594.24	913.382
3621.35	1171.83
3029.24	1043.36
2872.71	2746.63
3511.17	1148.63
3780.21	3754.77
3490.76	3583.81
2184.02	2367.46
1698.11	688.917
2418.06	2579
3275.59	3441.22
3089.79	1523.93
2816.12	2495.23
3162.92	3292.22
1784.54	1903.62
3899.68	3823.81
2201.79	861.455
2635.2	1764.69
3115.59	2925.85
2416.77	1010.1
2807.24	1067.31
1763.29	682.315
2736.37	2594.82
2859.41	2955.5
3365.9	3387.55
3661.1	3733.49
3652.86	1209.98
3867.67	3653.64
3245.39	3315.72
3782.35	3687.25
2048.91	933.957
2384.36	1113.97
1834.21	1721.59
3577.38	3440.8
3612.21	3771.71
2696.15	869.468
2999.78	2395.32
2123.66	1107.02
3501.59	3291.32
3764.47	3930.32
3767.22	3895.01
2618.7	1011.52
2778.42	1802.12
2525.69	2741.09
2807.61	2316.28
2575.88	910.005
4084.87	1527.35
2027.69	907.213
2283.17	826.701
3033.86	3059.43
2482.73	1744.72
2125.45	1072.02
2532.36	2705.66
3535.91	1214.67
2389.43	1201.73
2752.08	1191.99
2550.46	1045.44
2839.02	950.623
2339.19	2155.41
2251.1	1515.02
2236.28	853.565
3094.96	2738.8
2522.9	2495.03
2775.46	2818.75
2685.73	2776.45
3969.33	1445.36
3786.8	3668.13
3460.1	1023.35
3691.64	1504.63
3153.8	1677.67
2255	829.815
2962.83	1795.71
3762.53	3746.34
3163.49	1550.36
3604.83	3628.13
3343.88	2400.86
2169.62	2118.63
2501.91	784.814
3061.37	2626.97
2679.27	2511.3
3572.2	1191.02
3196.62	912.136
1610.47	668.787
2356.54	1068.43
2885.64	1068.77
2929.65	2187.05
2616.15	2320.08
2839.66	1223.46
2852.08	1072.75
3129.11	1153.73
3543.42	3623.3
3455.31	1034
2853.87	2276.27
3089.03	3176.68
2749.31	939.355
2796.24	1055.61
2481.4	968.739
2545.26	860.922
1827.97	778.883
2121.54	989.112
1999.19	1272.97
3135.34	891.336
2469.93	2459.43
3467.93	1076.46
3378.29	3145.51
3473.44	1017.88
2558.84	1107.05
1256.36	657.051
1640.11	913.968
3011.47	3247.86
2307.62	2568.87
3316.49	3071.89
1808.89	793.108
1815.69	973.952
2578.72	1060.45
3799.62	3760.06
3604.99	3271.84
1586.02	893.175
3855.1	1102.02
2377.42	850.303
3507.28	1058.93
2291.88	898.391
3669.27	3240.03
3435.52	1868.5
3411.25	3230.1
3545.03	3551.46
2315.61	1348.01
2361.44	882.114
2965.86	1775.25
2486.5	1930.55
3292.11	3115.77
2378.77	2327.79
3835.64	3507.5
3669.14	1134.1
1771.98	1598.02
3042.66	941.042
3362.62	877.207
3121.92	2599.32
3707.94	1087.16
3372.74	1524.62
2569.61	2015.47
3349.5	1762.79
1547.55	785.158
3016.76	3013.32
2072.75	721.452
2778.43	1982.5
1115.57	1031.2
2633.97	809.053
1686.64	804.667
1816.45	1504.86
2079.57	1392.03
2936.26	874.044
2256.65	906.554
2080.78	930.297
3271.89	2896.72
2674.15	2403.02
1087.41	665.961
1430.35	1309.91
1595.62	1186.66
1118.23	945.651
3677.97	3437.48
3229.08	2016.69
2986.92	1181.2
2429.43	839.789
1577.26	760.583
1413.7	764.972
2403.32	2272.97
2209.85	772.102
2130.74	949.68
2224.96	876.54
1731.05	963.581
3490.72	3444.57
2116.1	1142.59
3557.03	3498.4
1321.98	1216.23
1972.64	826.67
1616.56	881.384
2239.64	1186.12
2333.84	854.84
2288.87	856.92
1197.72	1090.99
2179	1985.94
1661.8	778.224
992.762	639.245
1136.58	872.151
2057.63	1611.15
2915.99	1033.61
1685.92	1415.46
2755.47	2184.39
2190.97	1732.82
1669.6	763.248
1703.34	1560.16
2433.14	2364.59
2408.74	754.554
1164.05	650.756
3109.17	2672.85
1660.92	1331.5
1461.44	677.774
3558.93	991.26
1604.45	709.772
1141.17	650.885
1774.2	789.268
1534.27	1332.54
1617.14	1541.41
3847.52	1128.03
1461.79	1335.49
3026.28	949.198
2659.92	2214.16
1554.63	1222.04
2481.88	982.434
2566.82	824.551
2186.26	713.383
1572.32	652.571
1603.9	711.979
1498.69	1008.31
1957.81	900.686
2231.17	862.222
1460.16	1084.78
1260.92	1075.81
3115.47	874.215
3665.82	1100.11
1558.05	1341.2
1067.97	901.935
1677.06	730.214
1606.92	735.315
2643.41	2565.32
2214.66	776.986
2031.8	1466.15
1830.36	730.685
1581.31	719.092
1130.22	641.145
2022.41	814.409
1388.58	731.091
1196.67	635.4
3729.72	1195.88
3654.2	951.353
1164.32	762.8
1492.82	1248.91
1462.34	1259.61
1487.02	785.945
1069.92	992.677
2102.68	1681.86
2010.94	789.923
1441.41	1322.06
1763.93	824.25
1887.26	769.152
1027.18	567.476
1243.56	646.055
1710.12	1367.85
2439.47	773.692
1856.19	1384.55
1694.26	1560.8
1473.72	742.781
2404.46	770.593
1185.86	1002.42
1422.25	689.696
1114.82	884.408
2936.24	948.644
1222.43	1036.26
2829.5	947.766
2254.07	2172
1263.77	766.347
1463.59	686.196
2275.03	917.159
1471.39	1258.56
1316.95	991.776
1193.88	650.599
1354.49	1128.42
1429.89	712.452
1166.39	965.976
1431.33	921.94
1112.16	620.943
2255.9	763.277
1160.85	1076.86
1516.96	753.262
2766.4	778.702
1361.16	703.433
1226.02	706.552
1296.68	687.461
1441.56	667.853
2126.7	746.574
1478.69	1144.15
1928.89	1337.94
1715.61	1391.64
1244.61	720.476
1470.5	645.955
1191.77	665.897
1113.62	897.431
1194.21	628.039
1190.53	637.524
1932.53	837.596
2488.35	2236.9
1254.54	1079.07
1333.61	1091.19
1297.38	991.194
1123.72	974.82
1085.49	912.656
1340.18	666.597
1829.94	730.659
1384.09	1201.79
1062.12	650.715
1388.37	1160.58
1850.76	722.792
2606.8	765.806
1386.28	697.512
1660.62	1353.05
1275.68	670.34
1054.39	833.888
1114.15	860.332
1248.54	1026.53
1388.3	628.046
1875.99	692.504
1092.52	794.328
1123.63	644.802
1114.95	612.235
1003.24	662.939
