# Supplementary material for: Recording γ-secretase activity in living mouse brains
Source: eLife. 2024 Oct 3;13:RP96848. doi: 10.7554/eLife.96848 (PMC11449482; doi:10.7554/eLife.96848)
Supplement: Figure 2—figure supplement 2—source data 3. [file elife-96848-fig2-figsupp2-data3.xlsx]

## Sheet: Fig 2—fig sup 2C
Veh	DAPT
2.00304	1.60603
1.91638	1.70178
1.97336	1.66591
1.7931	1.71145
1.87776	1.57858
1.68797	1.34023
1.74443	1.49076
1.93343	1.5854
2.14338	1.93739
1.94863	1.58235
2.64145	1.60397
2.581	2.13937
1.9222	1.38882
1.8967	1.4502
1.93166	1.51235
1.97288	1.55897
1.82139	1.48256
2.33256	2.21516
1.96619	1.64293
1.70765	1.53273
1.77413	1.51876
1.94476	1.83525
1.84478	1.68798
1.99338	1.60294
2.01687	1.59598
2.33497	2.00963
2.50405	1.96494
2.34905	1.99171
2.09541	1.87433
2.6502	1.70893
1.87978	1.44204
2.02053	1.7031
2.31409	2.20099
2.21207	1.62733
2.04245	1.71734
1.97537	1.56124
1.89814	1.5509
1.84894	1.22006
1.88182	1.74807
1.67601	1.43671
1.82298	1.53405
1.669	1.51753
1.76286	1.52181
2.3948	1.72528
2.24168	1.58452
1.8632	1.60571
1.70523	1.29687
1.65113	1.40434
1.85604	1.35396
1.89766	1.53
