# Supplementary material for: Recording γ-secretase activity in living mouse brains
Source: eLife. 2024 Oct 3;13:RP96848. doi: 10.7554/eLife.96848 (PMC11449482; doi:10.7554/eLife.96848)
Supplement: Figure 3—figure supplement 1—source data 1. [file elife-96848-fig3-figsupp1-data1.xlsx]

## Sheet: Fig 3—fig sup 1A
670 intensity	Average 670 intensity in 5 neighbering neurons
969.278	967.943
1233.33	1015.37
889.098	1082.28
1788.61	1120.37
1288.29	901.076
757.47	968.48
887.367	874.085
1042.99	980.232
821.045	1043.87
1208.31	1018.43
977.411	1005.56
1087.59	952.411
831.164	866.83
858.303	1036.41
1070.82	925.063
1106.27	802.957
1333.8	1218.47
985.693	933.711
875.345	955.78
868.805	859.302
782.964	873.616
903.817	802.004
1327.77	1101.99
1062.7	968.344
1159.17	1096.66
1067.61	1067.05
976.422	1023.73
983.677	836.327
815.833	887.921
967.459	950.224
856.218	1052.01
887.727	952.304
762.053	889.397
993.775	1153.7
1089.88	864.455
1062.78	1018.91
849.455	1044.41
1893.85	1449.53
1375.38	1178.28
951.825	1132.95
1355.78	820.15
1083.87	1050.46
1016.65	945.276
811.336	954.728
950	1064.66
814.854	1093.34
761.801	871.85
769.432	870.324
905.664	843.078
773.011	1009.86
828.339	1019.21
1441.63	1075.8
891.336	1092.33
1631.1	1123.23
1499.7	1171.72
1016.77	1301.56
935.481	1037.36
1044.72	1302.08
1198.8	1201.58
1597.43	1036.47
1079.44	938.168
1195.52	1140.82
1517.08	1186.95
1213.05	986.817
1304.88	943.113
946.944	1028.21
877.788	1318.71
1071.22	1057.25
776.055	954.06
1327.26	1515.31
982.976	1341.76
2159.03	1132.95
1307.89	1014.29
847.006	1133.66
1311.56	1106.99
1181.14	1034.37
1028.07	1106.55
1195.26	966.467
813.805	1034.01
875.561	1030.17
1351.77	985.957
1089.64	1149.62
1184.63	972.901
886.588	1030.3
931.915	1038.97
1151.49	1071.99
970.568	1173.43
774.422	871.535
955.153	1052.5
1306.28	1051.82
1003.76	1248.7
913.382	1307.69
1171.83	1256
1043.36	1134.78
1148.63	1022.83
688.917	890.293
1523.93	1302.82
861.455	1103.24
1010.1	1248.52
1067.31	1145.14
682.315	822.069
1209.98	1069.69
933.957	993.478
1113.97	1103.96
869.468	1268.31
1107.02	1138.54
1011.52	1372.41
1802.12	1194.66
910.005	1335.99
1527.35	874.567
907.213	1047.38
826.701	1055.07
1072.02	1182.46
1214.67	1171.41
1201.73	1121.49
1191.99	1398.68
1045.44	1295.26
950.623	1173.38
853.565	1079.85
1445.36	1173.62
1023.35	1125.17
1504.63	1053.62
1677.67	1114.16
829.815	1008.02
1795.71	1173.28
1550.36	1436.16
784.814	895.58
1191.02	1100.54
912.136	1028.46
668.787	873.331
1068.43	1148.16
1068.77	1085.83
1223.46	1267.09
1072.75	1097.14
1153.73	1080.94
1034	1104.89
939.355	1005.23
1055.61	1306.87
968.739	1323.96
860.922	1295.87
778.883	876.964
989.112	1077.49
1272.97	967.474
891.336	976.377
1076.46	1096.4
1017.88	926.816
1107.05	1065.14
657.051	848.923
913.968	840.287
793.108	874.119
973.952	872.137
1060.45	1259.57
893.175	982.574
1102.02	1176.21
850.303	1191.78
1058.93	1007.41
898.391	1418.45
1868.5	1226.82
1348.01	888.964
882.114	990.099
1775.25	1151.97
1134.1	998.664
941.042	880.5
877.207	1008.11
1087.16	1513.7
1524.62	1285.54
1762.79	1088.35
785.158	758.113
721.452	837.704
809.053	974.723
804.667	862.147
874.044	1033.07
906.554	816.04
930.297	869.961
665.961	703.834
2016.69	1033.85
1181.2	1083.28
839.789	908.263
760.583	887.102
764.972	857.175
772.102	937.962
949.68	919.329
876.54	1149.7
963.581	883.504
1142.59	1058.83
826.67	981.99
881.384	974.141
1186.12	991.486
854.84	1057.74
856.92	983.061
778.224	838.394
639.245	776.029
1033.61	1008.25
763.248	1008.65
754.554	791.727
650.756	854.499
677.774	812.062
991.26	1117.7
709.772	792.514
650.885	732.471
789.268	825.188
1128.03	1032.46
949.198	824.872
982.434	1283.51
824.551	939.952
713.383	1112.3
652.571	730.001
711.979	732.367
900.686	785.847
862.222	802.643
874.215	876.988
1100.11	1002.96
730.214	764.55
735.315	799.329
776.986	928.571
730.685	806.525
719.092	962.222
641.145	790.77
814.409	851.134
731.091	777.216
635.4	703.459
1195.88	989.869
951.353	951.955
762.8	766.51
785.945	768.282
789.923	960.068
824.25	894.52
769.152	759.655
567.476	701.133
646.055	812.512
773.692	821.556
742.781	763.663
770.593	750.99
689.696	708.661
948.644	1041.09
947.766	1143.51
766.347	664.923
686.196	792.06
917.159	797.167
650.599	730.822
712.452	725.243
921.94	762.292
620.943	774.165
763.277	751.419
753.262	763.611
778.702	780.792
703.433	789.266
706.552	744.022
687.461	695.203
667.853	680.543
746.574	779.674
720.476	687.923
645.955	698.728
665.897	697.388
628.039	702.068
637.524	737.261
837.596	774.325
666.597	780.956
730.659	991.641
650.715	674.996
722.792	773.165
765.806	779.513
697.512	732.187
670.34	680.237
628.046	719.46
692.504	669.704
644.802	690.828
612.235	734.379
662.939	753.016

## Sheet: Fig 3—fig sup 1B
670 intensity	720/670 ratio
969.278	1.94392
1233.33	1.50561
889.098	2.08873
1788.61	1.74656
1288.29	2.03692
757.47	1.94352
887.367	2.06724
1042.99	1.84536
821.045	2.07372
1208.31	3.15925
977.411	2.34776
1087.59	1.54446
831.164	1.73122
858.303	1.98468
1070.82	1.78189
1106.27	1.51476
1333.8	2.18676
985.693	1.81581
875.345	2.08991
868.805	1.69979
782.964	2.33368
903.817	2.94562
1327.77	2.49515
1062.7	3.20557
1159.17	2.52717
1067.61	3.41878
976.422	2.70882
983.677	3.70134
815.833	2.61492
967.459	2.13135
856.218	2.47823
887.727	2.76799
762.053	3.10906
993.775	2.65345
1089.88	1.79502
1062.78	2.59859
849.455	2.81061
1893.85	1.94105
1375.38	1.55175
951.825	3.00906
1355.78	1.85591
1083.87	2.59079
1016.65	2.60616
811.336	2.06297
950	2.75185
814.854	2.78271
761.801	2.60313
769.432	2.0075
905.664	1.82629
773.011	2.3869
828.339	2.17795
1441.63	1.81981
891.336	2.78975
1631.1	1.56766
1499.7	1.66391
1016.77	2.38836
935.481	3.41375
1044.72	2.72091
1198.8	2.29151
1597.43	2.42785
1079.44	2.12494
1195.52	3.38985
1517.08	1.70066
1213.05	3.09202
1304.88	2.26916
946.944	2.50172
877.788	2.95493
1071.22	2.86089
776.055	2.44746
1327.26	3.0255
982.976	2.39731
2159.03	1.58313
1307.89	2.05408
847.006	2.61932
1311.56	3.00842
1181.14	3.32234
1028.07	2.6005
1195.26	2.07219
813.805	2.92665
875.561	2.83863
1351.77	2.89615
1089.64	3.27925
1184.63	2.06725
886.588	2.7413
931.915	3.0726
1151.49	1.8396
970.568	2.55834
774.422	2.47419
955.153	2.98826
1306.28	2.9529
1003.76	2.56242
913.382	2.84026
1171.83	3.09033
1043.36	2.90336
1148.63	3.05683
688.917	2.46489
1523.93	2.02752
861.455	2.55589
1010.1	2.3926
1067.31	2.6302
682.315	2.58428
1209.98	3.01894
933.957	2.1938
1113.97	2.1404
869.468	3.10092
1107.02	1.91835
1011.52	2.58887
1802.12	1.54175
910.005	2.83062
1527.35	2.67448
907.213	2.23508
826.701	2.76178
1072.02	1.98266
1214.67	2.911
1201.73	1.98831
1191.99	2.30881
1045.44	2.43961
950.623	2.98648
853.565	2.61993
1445.36	2.74625
1023.35	3.38115
1504.63	2.45352
1677.67	1.87987
829.815	2.71747
1795.71	1.64995
1550.36	2.04049
784.814	3.1879
1191.02	2.99929
912.136	3.50454
668.787	2.40804
1068.43	2.20562
1068.77	2.69995
1223.46	2.321
1072.75	2.65867
1153.73	2.71216
1034	3.34168
939.355	2.92681
1055.61	2.64893
968.739	2.56147
860.922	2.95644
778.883	2.34691
989.112	2.14489
1272.97	1.57049
891.336	3.51757
1076.46	3.2216
1017.88	3.41241
1107.05	2.31141
657.051	1.91213
913.968	1.79449
793.108	2.28076
973.952	1.86425
1060.45	2.43171
893.175	1.77571
1102.02	3.49823
850.303	2.79597
1058.93	3.3121
898.391	2.55109
1868.5	1.83865
1348.01	1.7178
882.114	2.67703
1775.25	1.67067
1134.1	3.2353
941.042	3.23329
877.207	3.83333
1087.16	3.41066
1524.62	2.21218
1762.79	1.90011
785.158	1.97101
721.452	2.87302
809.053	3.25562
804.667	2.09608
874.044	3.3594
906.554	2.48926
930.297	2.23669
665.961	1.63285
2016.69	1.60118
1181.2	2.52872
839.789	2.8929
760.583	2.07375
764.972	1.84804
772.102	2.86212
949.68	2.24364
876.54	2.53835
963.581	1.79648
1142.59	1.85202
826.67	2.38625
881.384	1.83412
1186.12	1.8882
854.84	2.73015
856.92	2.67104
778.224	2.13538
639.245	1.55302
1033.61	2.82118
763.248	2.18749
754.554	3.19227
650.756	1.78877
677.774	2.15624
991.26	3.59031
709.772	2.26051
650.885	1.75326
789.268	2.2479
1128.03	3.41084
949.198	3.18825
982.434	2.52626
824.551	3.113
713.383	3.06464
652.571	2.40942
711.979	2.25274
900.686	2.17369
862.222	2.5877
874.215	3.56373
1100.11	3.33222
730.214	2.29667
735.315	2.18535
776.986	2.85032
730.685	2.50499
719.092	2.19904
641.145	1.76281
814.409	2.48329
731.091	1.89932
635.4	1.88334
1195.88	3.11882
951.353	3.84105
762.8	1.52638
785.945	1.89201
789.923	2.54574
824.25	2.14004
769.152	2.45369
567.476	1.81009
646.055	1.92486
773.692	3.15302
742.781	1.98406
770.593	3.12027
689.696	2.06215
948.644	3.09519
947.766	2.98545
766.347	1.64909
686.196	2.13291
917.159	2.48052
650.599	1.83506
712.452	2.007
921.94	1.55252
620.943	1.79109
763.277	2.95554
753.262	2.01385
778.702	3.55258
703.433	1.93502
706.552	1.73522
687.461	1.88619
667.853	2.1585
746.574	2.84861
720.476	1.72748
645.955	2.27648
665.897	1.78972
628.039	1.90149
637.524	1.86742
837.596	2.30724
666.597	2.01049
730.659	2.5045
650.715	1.63224
722.792	2.56058
765.806	3.404
697.512	1.98746
670.34	1.90304
628.046	2.2105
692.504	2.70899
644.802	1.7426
612.235	1.82112
662.939	1.51333
