# Supplementary material for: Recording γ-secretase activity in living mouse brains
Source: eLife. 2024 Oct 3;13:RP96848. doi: 10.7554/eLife.96848 (PMC11449482; doi:10.7554/eLife.96848)
Supplement: Figure 3—figure supplement 2—source data 1. [file elife-96848-fig3-figsupp2-data1.xlsx]

## Sheet: Fig 3—fig sup 2B
ROI_id	720/670 ratio	nearest_mean_720/670 ratios
1	1.94392	1.92781
2	1.50561	2.62399
3	2.08873	2.33243
4	1.74657	2.57084
5	2.03692	2.23841
6	1.94352	1.80372
7	2.06724	3.01751
8	1.84536	2.06342
9	2.07372	1.88329
10	3.15925	1.79717
11	2.34776	2.66846
12	1.54446	2.00324
13	1.73122	2.70057
14	1.98468	1.92781
15	1.78189	2.00882
16	1.51476	2.21471
17	2.18676	2.23374
18	1.81581	2.06342
19	2.08991	1.92637
20	1.69979	2.71628
21	2.33368	2.88429
22	2.94562	2.4743
23	2.49515	3.07007
24	3.20557	2.23635
25	2.52717	2.60483
26	3.41877	2.64981
27	2.70882	3.00868
28	3.70134	2.03245
29	2.61492	3.02734
30	2.13135	2.07139
31	2.47823	1.89992
32	2.76799	2.65749
33	3.10906	2.05894
34	2.65345	3.09823
35	1.79502	2.28243
36	2.59859	3.00478
37	2.81061	2.68708
38	1.94105	2.52651
39	1.55175	2.93118
40	3.00906	2.30478
41	1.85591	2.62311
42	2.59079	3.00868
43	2.60616	2.7893
44	2.06297	1.81659
45	2.75185	2.8453
46	2.78271	3.0336
47	2.60313	2.46768
48	2.0075	2.05894
49	1.82629	2.05894
50	2.3869	1.98649
51	2.17795	2.09096
52	1.81981	3.1657
53	2.78975	2.41443
54	1.56766	2.13154
55	1.66391	2.15579
56	2.38836	2.66198
57	3.41375	2.71808
58	2.72091	2.9188
59	2.29151	2.40304
60	2.42785	3.23529
61	2.12494	2.77666
62	3.38985	3.00478
63	1.70066	2.06504
64	3.09202	2.41202
65	2.26916	2.76404
66	2.50172	2.45541
67	2.95493	2.47512
68	2.86089	2.55754
69	2.44746	1.96319
70	3.0255	1.80532
71	2.39731	2.6575
72	1.58313	2.71141
73	2.05408	2.92554
74	2.61932	2.17938
75	3.00842	3.02691
76	3.32234	2.44621
77	2.6005	2.6575
78	2.07219	2.71418
79	2.92664	2.39283
80	2.83863	2.17066
81	2.89615	2.5045
82	3.27925	2.52674
83	2.06725	2.58761
84	2.7413	2.45478
85	3.0726	3.1553
86	1.8396	2.89678
87	2.55834	3.00008
88	2.47419	2.15513
89	2.98826	3.01275
90	2.9529	2.99834
91	2.56242	2.27046
92	2.84026	2.13154
93	3.09033	2.30583
94	2.90336	2.67017
95	3.05683	3.46566
96	2.46489	2.28205
97	2.02752	2.30432
98	2.55589	2.73983
99	2.3926	3.00568
100	2.6302	2.18763
101	2.58428	2.23551
102	3.01894	2.68541
103	2.1938	2.78352
104	2.1404	2.84628
105	3.10092	2.80446
106	1.91835	2.67531
107	2.58887	2.49582
108	1.54175	2.11941
109	2.83062	2.14944
110	2.67448	2.48819
111	2.23508	2.59438
112	2.76178	2.95851
113	1.98266	2.38755
114	2.911	2.50434
115	1.98831	2.5008
116	2.30881	2.05514
117	2.43961	2.11358
118	2.98648	2.04275
119	2.61993	2.78652
120	2.74625	2.02026
121	3.38115	2.3853
122	2.45352	3.00214
123	1.87987	2.5008
124	2.71747	1.70926
125	1.64995	2.06531
126	2.04049	2.38163
127	3.1879	2.31383
128	2.99929	3.29957
129	3.50454	2.27064
130	2.40804	2.27764
131	2.20562	2.39214
132	2.69995	2.71305
133	2.321	2.48327
134	2.65867	3.12027
135	2.71216	3.28164
136	3.34168	2.96688
137	2.92681	3.12151
138	2.64893	2.24029
139	2.56147	3.0298
140	2.95644	3.33145
141	2.34691	1.95681
142	2.14489	2.30643
143	1.57049	2.81042
144	3.51757	3.20811
145	3.2216	3.00018
146	3.41241	2.73258
147	2.31141	2.69801
148	1.91213	1.98988
149	1.79449	1.9359
150	2.28076	2.76741
151	1.86425	3.09079
152	2.43171	2.39214
153	1.77571	2.08491
154	3.49823	2.4497
155	2.79597	2.09697
156	3.3121	3.02824
157	2.55109	2.72557
158	1.83865	2.36922
159	1.7178	3.24161
160	2.67703	2.87622
161	1.67067	2.34753
162	3.2353	3.06664
163	3.23329	2.68114
164	3.83333	2.68114
165	3.41066	1.62557
166	2.21218	1.93957
167	1.90011	3.12224
168	1.97101	2.73433
169	2.87302	3.16129
170	3.25562	2.25261
171	2.09608	1.7851
172	3.3594	2.65317
173	2.48926	3.05315
174	2.23669	3.0477
175	1.63285	1.83269
176	1.60118	2.96969
177	2.52872	2.33291
178	2.8929	1.75714
179	2.07375	1.9359
180	1.84804	2.29086
181	2.86212	2.38752
182	2.24364	2.7006
183	2.53835	3.13726
184	1.79648	2.25421
185	1.85202	2.32765
186	2.38625	1.92801
187	1.83412	2.3366
188	1.8882	2.7006
189	2.73015	2.45734
190	2.67105	2.48689
191	2.13538	2.49475
192	1.55302	2.0285
193	2.82118	2.72607
194	2.18749	2.12372
195	3.19227	2.55831
196	1.78877	3.43849
197	2.15624	2.66336
198	3.59031	2.28406
199	2.26051	2.02219
200	1.75326	1.59294
201	2.2479	2.15073
202	3.41084	2.82047
203	3.18825	2.07453
204	2.52626	2.46692
205	3.11299	3.70239
206	3.06464	2.33205
207	2.40942	2.03141
208	2.25274	2.03012
209	2.17369	2.53549
210	2.5877	2.32849
211	3.56373	2.79676
212	3.33222	2.50351
213	2.29667	2.25599
214	2.18535	2.75326
215	2.85032	2.79866
216	2.50499	2.02219
217	2.19904	1.94169
218	1.76281	2.74246
219	2.48329	2.38069
220	1.89932	2.09155
221	1.88334	2.62721
222	3.11882	2.61021
223	3.84105	3.26192
224	1.52638	2.38275
225	1.89201	2.25792
226	2.54574	3.62595
227	2.14004	2.70444
228	2.45369	1.81361
229	1.81009	2.43716
230	1.92486	2.60001
231	3.15302	3.25406
232	1.98406	2.04918
233	3.12027	2.04234
234	2.06214	2.08424
235	3.09519	3.19814
236	2.98545	3.25302
237	1.64909	2.30524
238	2.13291	2.67741
239	2.48052	2.93548
240	1.83506	2.40083
241	2.007	2.01208
242	1.55252	2.20915
243	1.79109	2.0717
244	2.95554	3.3528
245	2.01385	2.34674
246	3.55258	3.05428
247	1.93502	2.05655
248	1.73522	2.3321
249	1.88619	1.76616
250	2.1585	1.79745
251	2.84861	2.19316
252	1.72748	2.08275
253	2.27648	1.97708
254	1.78972	2.02234
255	1.90149	2.17904
256	1.86742	1.89537
257	2.30724	2.2455
258	2.01048	2.63139
259	2.5045	3.04032
260	1.63224	2.35802
261	2.56058	1.97444
262	3.404	2.14735
263	1.98746	2.85562
264	1.90304	2.18097
265	2.2105	2.09445
266	2.709	1.77529
267	1.7426	1.80684
268	1.82112	2.77002
269	1.51332	1.91903

## Sheet: Fig 3—fig sup 2C
ROI_id	720/670 ratio	nearest_mean_720/670 ratios
1	1.94392	2.12405
2	1.50561	2.03144
3	2.08873	1.97312
4	1.74657	2.49944
5	2.03692	2.15292
6	1.94352	2.05168
7	2.06724	2.5961
8	1.84536	2.31313
9	2.07372	2.04933
10	3.15925	1.89452
11	2.34776	2.26257
12	1.54446	2.11286
13	1.73122	2.21066
14	1.98468	2.05823
15	1.78189	2.0578
16	1.51476	2.47407
17	2.18676	2.54017
18	1.81581	2.07934
19	2.08991	2.14762
20	1.69979	2.2138
21	2.33368	2.51495
22	2.94562	2.561
23	2.49515	2.77826
24	3.20557	2.1966
25	2.52717	2.82892
26	3.41877	2.74285
27	2.70882	2.72688
28	3.70134	2.34667
29	2.61492	2.62393
30	2.13135	2.28421
31	2.47823	2.37405
32	2.76799	2.53622
33	3.10906	2.46713
34	2.65345	2.62393
35	1.79502	2.20627
36	2.59859	2.96414
37	2.81061	2.79014
38	1.94105	2.37917
39	1.55175	2.72375
40	3.00906	2.88722
41	1.85591	2.40873
42	2.59079	2.82996
43	2.60616	2.82041
44	2.06297	2.17401
45	2.75185	2.76026
46	2.78271	2.78539
47	2.60313	2.49935
48	2.0075	2.29204
49	1.82629	2.60271
50	2.3869	2.11792
51	2.17795	2.27604
52	1.81981	2.80033
53	2.78975	2.77058
54	1.56766	2.41734
55	1.66391	2.21096
56	2.38836	2.50652
57	3.41375	2.67051
58	2.72091	2.51091
59	2.29151	2.61108
60	2.42785	2.66069
61	2.12494	2.3401
62	3.38985	2.77454
63	1.70066	2.53937
64	3.09202	2.67075
65	2.26916	2.6138
66	2.50172	2.55121
67	2.95493	2.53151
68	2.86089	2.54956
69	2.44746	2.32131
70	3.0255	2.29339
71	2.39731	2.38038
72	1.58313	2.44391
73	2.05408	2.65309
74	2.61932	2.56045
75	3.00842	2.84565
76	3.32234	2.62482
77	2.6005	2.51153
78	2.07219	2.59417
79	2.92664	2.45269
80	2.83863	2.51302
81	2.89615	2.52961
82	3.27925	2.53327
83	2.06725	2.74436
84	2.7413	2.40425
85	3.0726	2.58544
86	1.8396	2.64269
87	2.55834	2.39482
88	2.47419	2.24816
89	2.98826	2.8912
90	2.9529	2.99838
91	2.56242	2.56129
92	2.84026	2.6776
93	3.09033	2.28616
94	2.90336	2.43038
95	3.05683	2.81447
96	2.46489	2.11012
97	2.02752	2.29142
98	2.55589	2.58111
99	2.3926	2.44485
100	2.6302	2.38738
101	2.58428	2.1498
102	3.01894	2.55165
103	2.1938	2.42762
104	2.1404	2.49387
105	3.10092	2.57173
106	1.91835	2.40113
107	2.58887	2.5952
108	1.54175	2.76142
109	2.83062	2.48804
110	2.67448	2.49553
111	2.23508	2.42765
112	2.76178	2.44271
113	1.98266	2.42993
114	2.911	2.2877
115	1.98831	2.47151
116	2.30881	2.4045
117	2.43961	2.48731
118	2.98648	2.33354
119	2.61993	2.77168
120	2.74625	2.58349
121	3.38115	2.201
122	2.45352	2.85489
123	1.87987	2.41473
124	2.71747	2.45355
125	1.64995	2.7506
126	2.04049	2.34106
127	3.1879	2.25481
128	2.99929	2.78853
129	3.50454	2.54287
130	2.40804	2.45885
131	2.20562	2.4912
132	2.69995	2.45482
133	2.321	2.3177
134	2.65867	2.65023
135	2.71216	2.60419
136	3.34168	2.54123
137	2.92681	2.49932
138	2.64893	2.50621
139	2.56147	2.30156
140	2.95644	2.86817
141	2.34691	2.02756
142	2.14489	2.32385
143	1.57049	2.63327
144	3.51757	2.63155
145	3.2216	2.60937
146	3.41241	2.57507
147	2.31141	2.51483
148	1.91213	1.99216
149	1.79449	2.30793
150	2.28076	1.99253
151	1.86425	2.6593
152	2.43171	2.28692
153	1.77571	2.18301
154	3.49823	2.56811
155	2.79597	2.52244
156	3.3121	2.53404
157	2.55109	2.54539
158	1.83865	2.84524
159	1.7178	2.75772
160	2.67703	2.59727
161	1.67067	2.71295
162	3.2353	2.49685
163	3.23329	2.75702
164	3.83333	2.62381
165	3.41066	2.25527
166	2.21218	2.73962
167	1.90011	2.87196
168	1.97101	2.30287
169	2.87302	2.62231
170	3.25562	2.24132
171	2.09608	2.27629
172	3.3594	2.74399
173	2.48926	2.74413
174	2.23669	2.87927
175	1.63285	2.12932
176	1.60118	2.67059
177	2.52872	2.5779
178	2.8929	2.559
179	2.07375	2.17174
180	1.84804	2.39326
181	2.86212	2.74863
182	2.24364	2.9468
183	2.53835	2.71834
184	1.79648	2.2439
185	1.85202	2.48896
186	2.38625	2.36958
187	1.83412	2.5203
188	1.8882	2.82998
189	2.73015	2.83633
190	2.67105	2.84224
191	2.13538	2.50804
192	1.55302	2.19528
193	2.82118	2.54326
194	2.18749	2.081
195	3.19227	2.4692
196	1.78877	2.65137
197	2.15624	2.65
198	3.59031	2.59361
199	2.26051	2.10482
200	1.75326	2.05195
201	2.2479	2.26505
202	3.41084	2.86086
203	3.18825	2.32149
204	2.52626	2.88846
205	3.11299	2.96993
206	3.06464	2.55475
207	2.40942	2.33025
208	2.25274	2.43176
209	2.17369	2.18292
210	2.5877	2.40488
211	3.56373	2.66859
212	3.33222	2.87454
213	2.29667	2.16381
214	2.18535	2.3217
215	2.85032	2.37522
216	2.50499	2.12577
217	2.19904	2.26168
218	1.76281	2.32118
219	2.48329	2.3258
220	1.89932	2.27559
221	1.88334	2.30983
222	3.11882	2.90045
223	3.84105	2.96383
224	1.52638	2.08586
225	1.89201	2.59118
226	2.54574	2.84573
227	2.14004	2.45939
228	2.45369	2.47323
229	1.81009	2.22856
230	1.92486	2.50702
231	3.15302	2.38644
232	1.98406	2.40236
233	3.12027	2.12291
234	2.06214	2.64633
235	3.09519	2.83157
236	2.98545	2.84255
237	1.64909	2.1399
238	2.13291	2.54018
239	2.48052	2.99618
240	1.83506	2.1439
241	2.007	2.2771
242	1.55252	2.30773
243	1.79109	2.54728
244	2.95554	2.45479
245	2.01385	2.21832
246	3.55258	2.42663
247	1.93502	2.24241
248	1.73522	2.48884
249	1.88619	2.20914
250	2.1585	1.99987
251	2.84861	2.02198
252	1.72748	2.04297
253	2.27648	2.34504
254	1.78972	2.01243
255	1.90149	2.10271
256	1.86742	2.06039
257	2.30724	2.90413
258	2.01048	2.55855
259	2.5045	3.00085
260	1.63224	2.12074
261	2.56058	2.03137
262	3.404	2.60062
263	1.98746	2.80713
264	1.90304	2.09648
265	2.2105	2.26255
266	2.709	2.00944
267	1.7426	2.18059
268	1.82112	2.53772
269	1.51332	2.09068
