# Supplementary material for: Recording γ-secretase activity in living mouse brains
Source: eLife. 2024 Oct 3;13:RP96848. doi: 10.7554/eLife.96848 (PMC11449482; doi:10.7554/eLife.96848)
Supplement: Figure 3—source data 1. [file elife-96848-fig3-data1.xlsx]

## Sheet: Figure 3B
ROI_id	720/670 ratio	nearest_mean_720/670 ratios
1	1.94392	1.96483
2	1.50561	2.12961
3	2.08873	2.01084
4	1.74657	2.68244
5	2.03692	2.06319
6	1.94352	1.8551
7	2.06724	2.48233
8	1.84536	2.15292
9	2.07372	1.75211
10	3.15925	1.79673
11	2.34776	2.28697
12	1.54446	1.87654
13	1.73122	2.37301
14	1.98468	1.76992
15	1.78189	1.9271
16	1.51476	2.43218
17	2.18676	2.51932
18	1.81581	2.1648
19	2.08991	2.10998
20	1.69979	2.37929
21	2.33368	2.7109
22	2.94562	2.54561
23	2.49515	2.72123
24	3.20557	2.18472
25	2.52717	2.87986
26	3.41877	2.77884
27	2.70882	2.79646
28	3.70134	1.97898
29	2.61492	2.39977
30	2.13135	2.17863
31	2.47823	2.21171
32	2.76799	2.64048
33	3.10906	2.17946
34	2.65345	2.75882
35	1.79502	2.29828
36	2.59859	2.81528
37	2.81061	2.59875
38	1.94105	2.27691
39	1.55175	2.75015
40	3.00906	2.862
41	1.85591	2.61236
42	2.59079	2.97358
43	2.60616	2.72757
44	2.06297	2.09343
45	2.75185	2.67786
46	2.78271	2.79447
47	2.60313	2.21451
48	2.0075	2.33363
49	1.82629	2.36987
50	2.3869	2.04623
51	2.17795	2.13959
52	1.81981	3.00763
53	2.78975	2.84241
54	1.56766	2.51725
55	1.66391	2.2603
56	2.38836	2.30702
57	3.41375	2.86881
58	2.72091	2.45321
59	2.29151	2.3854
60	2.42785	2.64837
61	2.12494	2.47344
62	3.38985	2.67312
63	1.70066	2.59434
64	3.09202	2.57058
65	2.26916	2.67129
66	2.50172	2.76657
67	2.95493	2.23797
68	2.86089	2.73472
69	2.44746	2.13743
70	3.0255	2.06747
71	2.39731	2.19957
72	1.58313	2.55307
73	2.05408	2.66241
74	2.61932	2.47613
75	3.00842	3.02668
76	3.32234	2.7359
77	2.6005	2.3624
78	2.07219	2.75127
79	2.92664	2.39201
80	2.83863	2.4487
81	2.89615	2.77178
82	3.27925	2.56441
83	2.06725	2.76119
84	2.7413	2.40757
85	3.0726	3.00194
86	1.8396	2.6491
87	2.55834	2.70859
88	2.47419	2.22697
89	2.98826	3.02933
90	2.9529	3.0339
91	2.56242	2.3183
92	2.84026	2.36641
93	3.09033	2.3164
94	2.90336	2.34113
95	3.05683	3.0667
96	2.46489	2.12243
97	2.02752	2.39896
98	2.55589	2.74006
99	2.3926	2.36842
100	2.6302	2.29379
101	2.58428	1.986
102	3.01894	2.9046
103	2.1938	2.57662
104	2.1404	2.60504
105	3.10092	2.80293
106	1.91835	2.68994
107	2.58887	2.49343
108	1.54175	2.69021
109	2.83062	2.43562
110	2.67448	2.51889
111	2.23508	2.4239
112	2.76178	2.43655
113	1.98266	2.32927
114	2.911	2.16738
115	1.98831	2.45993
116	2.30881	2.212
117	2.43961	2.35583
118	2.98648	2.31395
119	2.61993	2.83407
120	2.74625	2.5379
121	3.38115	2.41087
122	2.45352	2.73404
123	1.87987	2.32806
124	2.71747	2.23265
125	1.64995	2.60417
126	2.04049	2.31087
127	3.1879	2.06052
128	2.99929	3.08015
129	3.50454	2.2898
130	2.40804	2.24422
131	2.20562	2.41647
132	2.69995	2.57771
133	2.321	2.51905
134	2.65867	2.97665
135	2.71216	2.96595
136	3.34168	2.84005
137	2.92681	2.79531
138	2.64893	2.47196
139	2.56147	2.50638
140	2.95644	2.60541
141	2.34691	2.18569
142	2.14489	2.65952
143	1.57049	2.6081
144	3.51757	2.63785
145	3.2216	2.86406
146	3.41241	2.59008
147	2.31141	2.74345
148	1.91213	1.97394
149	1.79449	2.27899
150	2.28076	2.19892
151	1.86425	2.76474
152	2.43171	2.10674
153	1.77571	1.96441
154	3.49823	2.53894
155	2.79597	2.2984
156	3.3121	2.80891
157	2.55109	2.26278
158	1.83865	2.65699
159	1.7178	2.69681
160	2.67703	2.48432
161	1.67067	2.4505
162	3.2353	2.73077
163	3.23329	2.8141
164	3.83333	2.87656
165	3.41066	1.99858
166	2.21218	2.47346
167	1.90011	2.99493
168	1.97101	2.41433
169	2.87302	2.72083
170	3.25562	2.10724
171	2.09608	2.21868
172	3.3594	2.92487
173	2.48926	3.00478
174	2.23669	2.74859
175	1.63285	1.96922
176	1.60118	2.73763
177	2.52872	2.4579
178	2.8929	2.10554
179	2.07375	2.0571
180	1.84804	2.64904
181	2.86212	2.67925
182	2.24364	2.79322
183	2.53835	2.54025
184	1.79648	2.32482
185	1.85202	2.61818
186	2.38625	2.22853
187	1.83412	2.72103
188	1.8882	2.81917
189	2.73015	2.65079
190	2.67105	2.66144
191	2.13538	2.53955
192	1.55302	1.92348
193	2.82118	2.47472
194	2.18749	1.96639
195	3.19227	2.31201
196	1.78877	2.8808
197	2.15624	2.70826
198	3.59031	2.46352
199	2.26051	2.19906
200	1.75326	1.95691
201	2.2479	2.42638
202	3.41084	2.93592
203	3.18825	2.32607
204	2.52626	2.70846
205	3.11299	3.17771
206	3.06464	2.22339
207	2.40942	2.2474
208	2.25274	2.17219
209	2.17369	2.41823
210	2.5877	2.13608
211	3.56373	2.74594
212	3.33222	2.92642
213	2.29667	2.34219
214	2.18535	2.55862
215	2.85032	2.51364
216	2.50499	2.29889
217	2.19904	2.02513
218	1.76281	2.4127
219	2.48329	2.26051
220	1.89932	2.26848
221	1.88334	2.23714
222	3.11882	2.89253
223	3.84105	2.97646
224	1.52638	2.07258
225	1.89201	2.61408
226	2.54574	3.28911
227	2.14004	2.62786
228	2.45369	2.22915
229	1.81009	2.3515
230	1.92486	2.42754
231	3.15302	2.87782
232	1.98406	2.39834
233	3.12027	2.1308
234	2.06214	2.42342
235	3.09519	3.17648
236	2.98545	2.68334
237	1.64909	1.98373
238	2.13291	2.33599
239	2.48052	2.81448
240	1.83506	2.06775
241	2.007	2.30759
242	1.55252	2.39351
243	1.79109	2.37734
244	2.95554	2.59754
245	2.01385	2.12053
246	3.55258	2.54349
247	1.93502	2.04995
248	1.73522	2.53295
249	1.88619	2.05372
250	2.1585	1.84614
251	2.84861	2.15599
252	1.72748	2.12517
253	2.27648	2.24805
254	1.78972	1.83277
255	1.90149	2.00905
256	1.86742	2.10811
257	2.30724	2.59909
258	2.01048	2.58768
259	2.5045	3.18714
260	1.63224	2.24591
261	2.56058	1.83095
262	3.404	2.46766
263	1.98746	2.61909
264	1.90304	1.95932
265	2.2105	2.08391
266	2.709	1.76799
267	1.7426	1.91378
268	1.82112	2.78201
269	1.51332	2.15995

## Sheet: Figure 3C
ROI_id	720/670 ratio	nearest_mean_720/670 ratios
1	1.59299	2.19955
2	2.15333	2.2269
3	1.68865	2.38472
4	1.78072	2.00864
5	3.41879	2.49623
6	1.98818	2.11812
7	3.24437	1.90614
8	2.30995	2.19905
9	1.80862	1.95666
10	3.51448	2.07296
11	2.83335	2.12704
12	2.43089	2.2057
13	1.76081	2.38668
14	2.01224	2.44823
15	1.77068	1.95365
16	3.28741	2.92134
17	1.98048	2.15829
18	1.68819	2.16737
19	1.89753	2.03145
20	2.1548	2.17718
21	2.06159	1.87223
22	2.51372	3.17219
23	1.68506	2.04147
24	2.00584	2.12383
25	2.43474	2.33404
26	1.86563	1.88374
27	2.57755	2.57294
28	1.64784	1.999
29	2.31505	2.21566
30	2.67628	2.05477
31	2.01977	2.37904
32	1.72051	2.39592
33	2.27789	1.96134
34	1.88047	2.0555
35	2.01768	2.0293
36	2.73304	2.14441
37	2.53413	2.77312
38	2.40643	2.54636
39	1.772	1.83272
40	2.33551	1.80867
41	1.86361	2.14514
42	2.44101	1.99935
43	2.0368	2.13235
44	2.734	2.33432
45	2.887	2.65849
46	2.12341	2.26727
47	1.6603	1.87365
48	1.96234	2.57258
49	1.97509	2.30383
50	2.59875	2.21437
51	2.82903	1.84591
52	1.82188	2.19552
53	2.1138	1.85275
54	1.77889	2.17193
55	2.02003	2.19235
56	2.58952	2.12606
57	2.09388	2.10002
58	1.81518	1.85294
59	2.14283	2.24021
60	2.69223	2.2883
61	2.91646	2.85704
62	2.13115	2.32146
63	2.6966	2.92495
64	1.51955	1.9227
65	2.30281	1.95729
66	1.77638	2.00891
67	2.44195	1.94965
68	1.59068	1.98209
69	1.81898	1.96869
70	1.6137	2.0929
71	1.87264	1.99971
72	2.59399	2.65958
73	2.14549	2.63083
74	2.22802	2.09547
75	1.90686	2.21475
76	3.40251	2.63594
77	2.2043	2.29558
78	3.58743	2.9916
79	1.57311	1.88864
80	1.86799	2.01669
81	1.75578	1.65674
82	1.81029	1.81645
83	2.16737	2.10027
84	2.12418	2.00578
85	2.17594	2.06323
86	2.805	2.10566
87	2.54341	2.35314
88	1.70329	2.1374
89	1.9084	2.77913
90	1.96023	1.90141
91	2.80232	1.98893
92	1.5597	2.1605
93	2.04817	2.11996
94	1.75201	2.04124
95	2.41078	2.14927
96	1.84781	1.8158
97	1.92906	2.08748
98	1.8493	2.15916
99	2.00687	1.9137
100	2.58617	2.60606
101	1.6877	1.91136
102	2.06702	2.58568
103	1.7842	2.27966
104	1.53152	1.94579
105	2.58785	1.86887
106	2.16637	2.30193
107	2.19633	1.83501
108	1.84791	1.77802
109	2.18769	2.00672
110	2.0559	2.27289
111	2.23113	2.31026
112	2.61362	2.7253
113	2.2572	2.25677
114	1.53069	1.72811
115	2.72534	2.34131
116	2.54123	2.07456
117	2.37453	2.49191
118	2.40651	2.26068
119	2.2661	2.30775
120	1.97266	2.06965
121	2.69155	1.72672
122	1.82727	1.97015
123	1.9465	2.51218
124	1.79687	1.94295
125	2.75768	2.53619
126	1.82311	2.13756
127	2.59393	2.76396
128	1.96271	2.06965
129	2.09142	2.16562
130	2.8944	2.08267
131	3.18631	2.48376
132	3.0554	2.14929
133	1.72	2.28828
134	1.79359	2.16369
135	2.36337	1.99739
136	2.15046	2.21045
137	2.01679	1.73701
138	2.1794	2.29238
139	2.12765	2.66897
140	1.89617	2.44026
141	1.85353	2.28473
142	3.15075	2.24572
143	1.50885	1.89824
144	1.8009	2.39537
145	2.35638	2.33672
146	2.69928	2.01432
147	2.19659	2.63446
148	2.76221	1.83036
149	1.8691	2.21992
150	3.54492	2.18581
151	2.13714	2.27126
152	2.37897	2.1178
153	1.86874	2.50793
154	2.36487	2.21791
155	1.65117	1.84235
156	2.49036	2.62522
157	1.67155	2.13517
158	1.71731	1.90544
159	1.74231	1.89732
160	2.57017	2.32417
161	1.91305	1.63566
162	1.75478	1.67433
163	1.53888	1.79047
164	1.60293	2.00963
165	1.78568	2.33328
166	2.5328	1.98444
167	2.91525	2.19491
168	2.04224	2.0875
169	2.10451	2.01844
170	2.2995	2.17311
171	2.35812	2.50373
172	1.77898	2.07783
173	1.84532	1.9783
174	3.10363	2.24881
175	2.06181	2.33446
176	2.82024	2.59676
177	2.29266	2.43249
178	2.90047	2.55295
179	2.13323	2.57809
180	2.91345	2.41045
181	1.78668	1.75678
182	1.91164	2.29956
183	2.05741	2.40194
184	1.77191	2.19296
185	1.9898	2.05442
186	1.70089	2.34717
187	2.08293	2.05877
188	2.09048	2.42807
189	2.0616	2.5384
190	3.47212	2.44165
191	2.1751	2.11302
192	2.05353	2.12304
193	2.16882	2.05597
194	1.7988	2.80808
195	2.375	2.65804
196	1.94995	2.00515
197	2.34265	2.56745
198	1.99516	2.4068
199	1.87788	2.78319
200	1.62799	2.66754
201	1.88329	2.17114
202	1.78415	1.98396
203	2.08784	2.08755
204	2.14972	2.2065
205	2.48277	2.15029
206	1.96416	2.26805
207	2.01652	2.06379
208	1.85156	2.3633
209	2.67376	2.46729
210	2.49525	2.40679
211	2.83246	2.37415
212	2.47478	2.25933
213	1.52227	1.79379
214	2.25338	1.74143
215	1.80738	2.50806
216	2.04477	2.11939
217	2.2092	2.32174
218	2.35368	2.28099
219	2.86341	2.47448
220	2.03263	2.1202
221	2.67509	1.79477
222	2.53838	2.2023
223	1.99637	1.8641
224	2.3257	2.48138
225	1.97426	2.53846
226	1.98478	2.11212
227	2.17983	2.041
228	2.25963	2.18767
229	1.83661	1.89633
230	3.05341	2.18273
231	2.57431	1.99575
232	2.34132	2.48674
233	2.2247	2.17917
234	2.08254	1.98815
235	1.92353	1.9369
236	2.21077	2.1845
237	2.33384	2.15024
238	2.06067	2.09763
239	2.42957	2.10935
240	2.9704	2.2261
241	2.971	2.64822
242	2.67882	2.76975
243	3.16063	2.6106
244	2.007	2.29499
245	1.67362	2.09937
246	3.59576	2.01678
247	1.90584	2.45473
248	2.13587	2.36139
249	2.73166	2.14362
250	2.64017	2.27509
251	3.3226	2.45067
252	2.01191	2.05358
253	2.86199	2.02369
254	1.88858	1.70011
255	1.64229	1.80416
256	2.20095	1.9006
257	1.51259	2.03129
258	1.98272	1.88115
259	1.73421	1.90406
260	2.31717	2.15393
261	1.82577	2.3108
262	2.72179	2.12412
263	3.01266	2.39953
264	1.76947	2.06124
265	1.73898	2.11107
266	1.86219	1.91324
267	1.83628	2.00174
268	2.2746	2.01553
269	1.73643	2.31281
270	2.18719	2.40504
271	2.03811	2.44476
272	2.41021	2.32606
273	1.79686	2.29107
274	2.4182	2.1001
275	2.23743	2.2244
276	2.24066	2.27238
277	1.82775	1.91142
278	1.90334	2.18944
279	2.04917	2.24538
280	2.1062	2.36418
281	2.14642	2.16084
282	2.52191	2.23136
283	1.69495	1.92961
284	1.89081	2.06802
285	1.80263	1.96535
286	3.0828	1.9476
287	1.87484	2.34555
288	2.44584	2.55622
289	3.47235	2.7191
290	2.20684	2.06744
291	1.52594	1.8516
292	1.70885	1.86713
293	1.99174	1.96258
294	2.26097	2.05282
295	1.51984	2.0077
296	2.31745	1.78084
297	1.75277	2.00439
298	2.19668	1.80402
299	2.70187	2.74096
300	2.39184	1.59455
301	2.45574	2.33973
302	1.89394	2.08966
303	1.92016	2.15927
304	1.86123	2.76488
305	1.86294	2.14238
306	1.73497	1.99531
307	1.68785	1.78733
308	2.17718	2.02283
309	2.34731	2.17177
310	1.97262	2.09552
311	1.96161	1.91702
312	1.8328	2.18679
313	2.02363	1.95022
314	3.19322	1.97488
315	1.80642	2.64466
316	1.81121	2.04678
317	2.22394	2.32937
318	3.18705	2.33907
319	1.63255	1.78559
320	2.65855	2.14656
321	1.60153	2.15113
322	1.91514	1.86417
323	1.72449	1.79706
324	1.54147	1.8393
325	1.57271	1.90163
326	1.99232	1.96247
327	1.74767	2.09843
328	2.17452	1.90601
329	2.03891	1.95254
330	1.56295	1.87471
331	2.0349	2.11783
332	1.55234	2.30975
333	2.96461	2.18392
334	1.72834	1.78999
335	2.11564	2.0656
336	1.92845	2.20235
337	1.58018	1.88093
338	1.85769	1.95181
339	1.66382	1.75736
340	2.36399	2.24462
341	1.5873	1.88625
342	1.54557	2.01259
343	2.08641	2.45854
344	2.28279	2.37229
345	2.04853	2.28486
346	2.56093	2.43166
347	1.6444	1.69871
348	1.68099	2.62717
349	2.09658	2.13404
350	2.36404	2.34022
351	1.95474	2.35757
352	1.80533	1.91868
353	1.55554	2.00555
354	1.674	2.33766
355	1.7868	2.08626
356	1.64692	1.90839
357	1.51526	1.88344
358	2.3965	2.85976
359	2.04784	1.75959
360	1.70034	1.97713
361	1.59	2.38463
362	2.01403	2.11862
363	1.98264	2.06029
364	1.94138	2.44057
365	1.92048	2.181
366	1.97266	2.3599
367	2.26018	1.92254
368	2.98101	2.68757
369	1.93342	2.30984
370	1.9644	2.26836
371	2.4284	2.14583
372	1.62977	1.81387
373	2.07706	2.19751
374	2.04587	1.88502
375	2.2693	2.58148
376	2.02763	1.92632
377	1.9008	1.97594
378	1.82699	1.96841
379	2.10522	2.35515
380	2.4559	1.82548
381	1.84848	2.09779
382	2.95845	2.27866
383	2.72952	2.0024
384	1.59646	2.01255
385	3.26988	2.59608
386	3.13824	2.28073
387	3.32725	2.00168
388	3.6044	2.39826
389	1.90783	2.37779
390	1.71747	2.29209
391	1.66678	2.23037
392	1.98927	1.7598
393	2.07487	2.00171
394	2.42642	2.46587
395	2.44328	1.89488
396	1.56421	2.10882
397	2.02278	2.48349
398	2.02705	2.37158
399	2.64722	2.36151
400	1.74137	2.05442
401	1.84806	1.74263
402	2.30275	2.05161
403	1.6178	1.79326
404	2.13252	2.26355
405	1.68543	1.94266
406	2.64104	1.84971
407	2.15027	1.73736
408	1.58444	1.94543
409	1.6154	1.99256
410	2.09568	2.31323
411	2.43789	2.59786
412	2.13217	1.71705
413	3.13015	2.24232
414	2.17677	2.37636
415	2.49281	1.81861
416	1.78685	1.78626
417	2.10953	2.40444
418	1.98637	2.30395
419	2.22672	1.79248
420	1.87658	1.97903
421	2.10347	2.01646
422	1.55957	1.7954
423	1.91565	2.13438
424	1.9693	1.68031
425	2.41595	2.32852
426	1.89164	1.63285
427	1.52931	1.89719
428	2.38718	1.76118
429	3.40391	1.859
430	2.00417	2.218
431	2.40484	2.09516
432	1.5792	1.84882
433	2.17448	1.70372
434	1.92267	2.15592
435	1.6971	1.8984
436	2.07509	1.89817
437	2.01435	2.02285
438	1.65973	2.06945
439	2.73159	2.23344
440	1.60226	2.12462
441	1.92273	2.08047
442	2.76259	2.2345
443	1.65329	1.90796
444	2.67997	2.18616
445	1.72288	2.18179
446	2.12227	2.39216
447	1.85631	1.97957
448	1.84453	2.10283
449	2.77093	2.16052
450	1.60764	1.83914
451	1.99281	1.91462
452	1.90517	1.98344
453	1.73602	2.12453
454	2.24266	2.11113
455	1.55131	1.90161
456	1.75814	2.18906
457	1.78328	2.57114
458	2.17652	1.9507
459	2.048	1.98692
460	2.53494	2.2425
461	3.20174	2.3331
462	1.70667	1.85915
463	1.71448	1.99883
464	1.97296	2.00089
465	1.63455	1.84819
466	2.21564	1.91122
467	1.59965	2.33796
468	2.21648	1.69647
469	1.57154	2.03958
470	2.33995	1.93322
471	1.78249	1.98523
472	1.75488	1.81015
473	1.61986	2.4156
474	1.6292	2.43529
475	1.94078	2.68381
476	1.67155	1.75869
477	1.51831	1.71879
478	1.57959	2.11656
479	2.90727	2.24595
480	1.69247	1.7545
481	1.70191	1.75238
482	1.5293	1.88666
483	1.5248	2.15154
484	1.64397	1.80866
485	1.71836	2.00212
486	1.60895	1.87082
487	2.61911	2.05905

## Sheet: Figure 3D
ROI_id	720/670 ratio	nearest_mean_720/670 ratios
1	1.60124	2.26378
2	1.84473	1.94513
3	1.52387	1.90463
4	1.68947	1.89332
5	1.58978	1.70486
6	1.66579	1.68435
7	1.60999	1.73043
8	1.63069	1.69136
9	1.55813	1.72255
10	1.82232	2.18657
11	1.9664	2.7433
12	1.74592	1.6995
13	1.92379	1.67464
14	2.31874	2.35343
15	1.67836	1.71707
16	2.21134	2.31504
17	1.716	1.73602
18	1.75677	1.70138
19	1.69002	1.68625
20	1.76589	1.69956
21	3.38395	2.07794
22	1.68607	1.7002
23	2.00966	1.90817
24	1.80773	1.83686
25	1.74534	2.31803
26	1.50412	2.18843
27	1.71067	1.86987
28	1.76756	1.85849
29	2.33575	1.78777
30	1.99288	2.14165
31	2.18767	2.23898
32	1.90801	1.90127
33	1.73885	1.98017
34	2.97349	1.89129
35	2.00837	1.97502
36	1.96245	2.26741
37	2.02936	1.89288
38	1.75566	2.00471
39	1.55294	1.89636
40	2.1495	2.16027
41	1.9065	2.20887
42	1.78845	1.98379
43	1.92108	1.92664
44	2.10296	2.19801
45	1.77317	1.95032
46	1.96391	1.79653
47	1.95608	2.28088
48	2.18613	1.88818
49	2.00216	2.21817
50	2.05662	1.76433
51	1.50075	2.02525
52	1.61096	1.84685
53	1.98561	1.77438
54	2.43088	2.14333
55	3.10865	2.09782
56	1.60909	1.98705
57	2.09181	2.12459
58	2.09671	2.30021
59	2.03947	2.35657
60	1.97622	1.88734
61	1.90932	2.23381
62	2.1013	1.94673
63	2.85864	2.13423
64	1.94281	2.48737
65	1.81403	1.84404
66	1.87267	2.17875
67	2.501	2.1184
68	1.83867	1.83697
69	3.0581	2.19834
70	2.00218	1.9025
71	1.93137	1.67026
72	2.24215	2.1026
73	1.68131	1.96114
74	1.98467	1.89541
75	2.70295	1.84717
76	1.76148	2.21564
77	1.85271	2.03805
78	2.21156	2.05137
79	1.78302	1.81665
80	2.28334	2.00604
81	1.90848	2.00938
82	2.03616	2.0577
83	2.1074	2.3957
84	1.72259	1.7202
85	1.8094	1.86984
86	3.15583	2.13566
87	2.44038	2.5017
88	1.79234	2.16719
89	1.7279	2.07016
90	1.98624	1.99383
91	2.0674	1.79337
92	1.52792	1.91959
93	2.06977	1.7929
94	1.79565	1.81516
95	2.04461	2.22933
96	1.70608	1.75899
97	1.95766	1.89124
98	3.36415	1.94774
99	2.05322	1.96963
100	1.92752	1.82502
101	3.26488	1.81786
102	2.20072	1.94762
103	1.86438	1.86595
104	1.7696	1.85463
105	1.96363	1.97047
106	2.26216	2.01437
107	2.19337	2.33724
108	2.52934	2.2367
109	2.28875	1.9637
110	1.67426	2.13442
111	2.25654	2.28864
112	2.18245	1.86527
113	1.99161	1.84248
114	2.62356	2.04002
115	1.94561	2.12422
116	1.70671	1.86886
117	1.83692	2.10345
118	1.97232	2.2231
119	2.55398	2.03921
120	1.64239	2.13643
121	2.35223	1.95835
122	1.62228	1.75711
123	1.87632	1.85645
124	1.75461	2.00526
125	2.00887	2.05351
126	1.79944	2.0954
127	2.30876	1.94247
128	1.5392	2.05712
129	2.02094	1.99965
130	1.50676	1.94978
131	1.76321	1.71365
132	1.93035	2.15356
133	2.5786	2.06074
134	2.08364	2.26224
135	1.83663	2.41337
136	2.13873	1.8634
137	1.84344	1.73922
138	1.59807	1.92813
139	1.80293	1.93446
140	1.50317	2.01025
141	2.09174	1.92698
142	2.21972	2.04478
143	1.92845	1.87943
144	2.99152	2.12045
145	1.88433	1.84798
146	1.93663	1.97373
147	2.0858	1.94262
148	2.13405	2.0918
149	1.68071	1.72538
150	1.73463	1.77295
151	2.7832	2.19688
152	2.68374	2.10519
153	1.72989	1.86786
154	2.07105	2.03973
155	2.07266	1.7737
156	2.20706	1.80972
157	1.93229	1.8401
158	1.87337	2.12874
159	1.60857	1.76861
160	3.35876	2.2482
161	2.12036	1.93432
162	2.07739	2.01944
163	1.72861	1.89634
164	1.78337	1.80634
165	2.00492	2.16291
166	2.30863	2.03383
167	1.68478	2.28836
168	1.76292	2.15581
169	1.6962	2.57952
170	1.97347	1.91619
171	1.6773	1.88428
172	1.70822	2.12329
173	1.70526	1.97372
174	1.69191	2.01343
175	1.53772	1.87342
176	1.70839	1.71985
177	1.86158	2.00008
178	2.12981	2.02557
179	1.62513	1.93579
180	1.85286	2.24145
181	1.78238	1.7352
182	2.28376	2.22881
183	2.50552	2.12421
184	1.82264	1.846
185	1.50485	1.77417
186	2.01462	2.14471
187	2.13819	1.91889
188	1.61586	2.0578
189	2.31293	2.14153
190	1.72548	2.01697
191	1.80407	2.13908
192	2.70248	1.82656
193	2.2983	2.09665
194	2.93783	1.89218
195	2.77609	1.92719
196	1.51685	1.76475
197	1.79413	1.82529
198	1.98655	1.70316
199	2.10057	2.02614
200	1.51082	1.96995
201	1.86209	1.77922
202	1.76242	1.78534
203	1.87242	2.17785
204	1.82038	1.82945
205	2.00016	1.81665
206	1.61381	2.12518
207	2.05913	1.726
208	1.99597	2.02909
209	1.63563	2.03494
210	1.52781	1.85479
211	2.1282	1.86593
212	2.05175	1.88122
213	2.60034	2.08161
214	1.74233	1.97823
215	1.5579	1.85005
216	1.80029	1.91567
217	2.17325	2.17446
218	1.71652	1.83585
219	2.12842	1.69991
220	1.69479	1.62908
221	1.51933	2.56858
222	2.07995	2.02622
223	1.76338	2.34027
224	1.63885	1.99783
225	1.75452	2.03328
226	1.62309	1.7628
227	2.69969	2.12614
228	2.18977	2.4785
229	1.96636	1.71404
230	1.79036	2.28165
231	1.71156	1.78717
232	1.87264	1.93066
233	2.76831	2.35906
234	1.67285	1.76547
235	1.59155	1.78173
236	1.88577	1.73086
237	1.68883	2.07914
238	1.60329	2.08451
239	1.82712	1.83408
240	1.62821	1.87386
241	1.88627	2.08606
242	1.9367	1.785
243	1.84746	1.98807
244	1.88346	1.72278
245	1.96535	1.76427
246	3.11952	2.19647
247	3.13762	1.73833
248	1.60084	1.73305
249	1.56119	1.77477
250	1.67979	1.68499
251	1.59798	1.62714
252	1.51023	2.00222
253	1.63182	2.14883
254	1.86861	2.08127
255	2.10863	1.73204
256	1.6626	1.70215
257	2.37128	1.94053
258	1.56065	1.67152
259	1.61201	1.83136
260	1.8312	1.71645
261	1.53419	2.21347
262	1.50976	1.72376
263	2.58367	1.73755
264	1.74539	1.95193
265	2.00258	1.67313
266	1.68751	2.17381
267	1.54323	1.765
