# Supplementary material for: Recording γ-secretase activity in living mouse brains
Source: eLife. 2024 Oct 3;13:RP96848. doi: 10.7554/eLife.96848 (PMC11449482; doi:10.7554/eLife.96848)
Supplement: Figure 4—source data 1. [file elife-96848-fig4-data1.xlsx]

## Sheet: Figure 4B
ROI_id	720/670 ratio	nearest_mean_720/670 ratios
1	1.94392	1.94677
2	1.50561	2.44057
3	2.08873	2.06807
4	1.74657	2.57084
5	2.03692	2.06319
6	1.94352	1.80372
7	2.06724	2.36651
8	1.84536	2.06342
9	2.07372	1.80402
10	3.15925	1.88577
11	2.34776	2.48728
12	1.54446	1.96928
13	1.73122	2.38284
14	1.98468	1.93318
15	1.78189	1.8867
16	1.51476	2.3865
17	2.18676	2.253
18	1.81581	2.06342
19	2.08991	2.02125
20	1.69979	2.49994
21	2.33368	2.90474
22	2.94562	2.68589
23	2.49515	2.85485
24	3.20557	2.23635
25	2.52717	3.38985
26	3.41877	2.82201
27	2.70882	2.84403
28	3.70134	1.95798
29	2.61492	2.94562
30	2.13135	2.19205
31	2.47823	1.85591
32	2.76799	2.65749
33	3.10906	2.17946
34	2.65345	3.03087
35	1.79502	2.23207
36	2.59859	2.81528
37	2.81061	2.60616
38	1.94105	2.21205
39	3.00906	2.73004
40	1.85591	2.47823
41	2.59079	3.02901
42	2.60616	2.72573
43	2.06297	2.09343
44	2.75185	2.8453
45	2.78271	2.70709
46	2.60313	2.1144
47	2.0075	2.26331
48	1.82629	2.30861
49	2.3869	2.02495
50	2.17795	2.08755
51	1.81981	3.12775
52	2.78975	2.84241
53	1.56766	2.51377
54	1.66391	2.15579
55	2.38836	2.39181
56	3.41375	2.831
57	2.72091	2.62988
58	2.29151	2.40304
59	2.12494	2.77666
60	3.38985	2.58914
61	1.70066	2.56071
62	3.09202	2.48156
63	2.50172	2.65979
64	2.95493	2.1341
65	2.86089	2.79811
66	2.44746	2.13135
67	3.0255	2.06747
68	2.39731	2.39069
69	1.58313	2.45106
70	2.05408	2.87793
71	2.61932	2.29151
72	3.00842	3.02691
73	3.32234	2.7359
74	2.6005	2.57214
75	2.07219	2.67788
76	2.92664	2.30117
77	2.83863	2.4487
78	2.89615	2.55415
79	3.27925	2.65882
80	2.06725	2.55589
81	2.7413	2.23508
82	3.0726	3.0142
83	1.8396	2.89678
84	2.55834	2.83177
85	2.47419	2.46489
86	2.98826	3.02933
87	2.9529	2.99834
88	2.56242	2.3183
89	2.84026	2.23027
90	3.09033	2.25006
91	2.90336	2.59796
92	3.05683	3.46566
93	2.46489	2.47419
94	2.02752	2.40893
95	2.55589	2.06725
96	2.3926	2.36842
97	2.6302	2.29379
98	3.01894	2.98353
99	2.1938	3.25562
100	2.1404	2.81294
101	3.10092	2.8694
102	1.91835	2.68744
103	2.58887	2.49343
104	1.54175	2.70053
105	2.83062	2.64893
106	2.23508	2.7413
107	1.98266	2.31344
108	2.911	2.06743
109	1.98831	2.45993
110	2.30881	2.00954
111	2.43961	2.30904
112	2.98648	2.31395
113	2.61993	2.86089
114	2.74625	2.11731
115	3.38115	2.38773
116	2.45352	2.90336
117	1.87987	2.34534
118	2.71747	1.57049
119	1.64995	2.25985
120	2.04049	2.55109
121	3.1879	2.28076
122	2.99929	3.29957
123	3.50454	1.86425
124	2.20562	2.41647
125	2.69995	2.71305
126	2.65867	3.07359
127	2.71216	2.96595
128	3.34168	2.62366
129	2.92681	3.41241
130	2.64893	2.24029
131	2.95644	3.33145
132	2.34691	1.95681
133	2.14489	2.50796
134	1.57049	2.71747
135	3.51757	3.20811
136	3.2216	2.64368
137	3.41241	2.92681
138	2.31141	2.71409
139	1.91213	1.63285
140	1.79449	2.09608
141	2.28076	2.76741
142	1.86425	3.50454
143	2.43171	2.10674
144	1.77571	2.07375
145	3.49823	2.4497
146	2.79597	2.2984
147	3.3121	3.02824
148	2.55109	2.04049
149	1.83865	2.36922
150	1.7178	3.24161
151	1.67067	2.34753
152	3.2353	3.3121
153	3.23329	2.48926
154	3.83333	2.87302
155	3.41066	1.60118
156	2.21218	1.83865
157	1.90011	3.12224
158	2.87302	3.16129
159	3.25562	2.25261
160	2.09608	1.79449
161	3.3594	3.51757
162	2.48926	3.05315
163	2.23669	2.86212
164	1.63285	2.0041
165	1.60118	3.41066
166	2.52872	3.06464
167	2.8929	1.92073
168	2.07375	1.77571
169	2.86212	2.38752
170	2.24364	2.4298
171	2.53835	2.86212
172	1.79648	2.47658
173	2.38625	1.92801
174	1.8882	2.69091
175	2.73015	2.26763
176	2.67105	2.28733
177	2.13538	3.06464
178	2.82118	2.72607
179	3.19227	1.88334
180	3.59031	2.50819
181	2.26051	2.18312
182	1.75326	1.63285
183	2.2479	2.36372
184	3.41084	2.87546
185	3.18825	1.76281
186	2.52626	1.83865
187	3.11299	3.70239
188	3.06464	2.33205
189	2.17369	2.5877
190	2.5877	2.32849
191	3.56373	3.11299
192	3.33222	3.11882
193	2.29667	2.007
194	2.18535	2.38625
195	2.85032	3.59031
196	2.50499	2.10163
197	2.19904	1.94169
198	1.76281	3.18825
199	2.48329	2.5877
200	1.89932	2.09155
201	1.88334	3.19227
202	3.11882	2.61021
203	3.84105	3.11299
204	1.89201	2.25792
205	2.54574	3.41084
206	2.14004	2.82118
207	2.45369	1.89201
208	3.15302	3.25406
209	1.98406	2.04918
210	2.06214	1.89201
211	3.09519	3.19814
212	2.98545	3.25302
213	2.48052	2.30724
214	2.007	2.29667
215	2.95554	3.3528
216	3.55258	3.05428
217	1.93502	2.56058
218	1.88619	1.78972
219	2.1585	1.72748
220	2.84861	1.90304
221	1.72748	2.1585
222	1.78972	1.88619
223	1.90149	2.709
224	1.86742	1.63224
225	2.30724	2.48052
226	1.63224	1.86742
227	2.56058	1.93502
228	3.404	1.98746
229	1.98746	3.404
230	1.90304	2.18097
231	2.709	1.90149
232	1.51332	1.90304

## Sheet: Figure 4C
ROI_id	720/670 ratio	nearest_mean_720/670 ratios
1	1.59299	2.15333
2	2.15333	2.55373
3	1.68865	1.89753
4	1.78072	2.00864
5	1.98818	2.17093
6	3.24437	1.88562
7	1.80862	1.82961
8	3.51448	2.16993
9	2.83335	2.16503
10	2.43089	2.59875
11	1.76081	2.1087
12	2.01224	2.50769
13	1.77068	1.95365
14	3.28741	2.91574
15	1.98048	2.23086
16	1.68819	2.08285
17	1.89753	2.09459
18	2.1548	2.23058
19	2.06159	1.87223
20	2.51372	3.12957
21	1.68506	1.99167
22	2.00584	2.14904
23	2.43474	2.27209
24	1.86563	2.00082
25	2.57755	3.51448
26	1.64784	2.08876
27	2.31505	2.21566
28	2.67628	2.05477
29	2.01977	2.20726
30	1.72051	2.45622
31	2.27789	2.00562
32	1.88047	1.80862
33	2.01768	1.86374
34	2.73304	2.10326
35	2.53413	2.77312
36	2.40643	2.56909
37	1.772	1.87811
38	2.33551	1.80867
39	1.86361	2.21116
40	2.44101	2.02978
41	2.0368	2.17876
42	2.734	2.43564
43	2.887	2.77879
44	2.12341	2.26727
45	1.6603	1.8676
46	1.96234	2.57258
47	1.97509	2.31548
48	2.59875	2.19376
49	2.82903	1.88547
50	1.82188	2.22586
51	2.1138	1.84895
52	1.77889	2.26306
53	2.02003	2.29572
54	2.58952	2.07537
55	2.09388	2.02504
56	1.81518	1.89967
57	2.14283	2.24021
58	2.69223	2.2883
59	2.91646	2.61544
60	2.13115	2.46408
61	2.6966	2.87423
62	1.51955	1.9819
63	2.30281	1.93457
64	1.77638	2.02118
65	2.44195	1.81434
66	1.59068	1.98209
67	1.81898	1.95404
68	1.6137	2.0929
69	1.87264	2.08767
70	2.59399	2.62323
71	2.14549	2.68765
72	2.22802	2.14263
73	1.90686	2.21475
74	3.40251	2.77496
75	2.2043	2.21415
76	3.58743	2.66237
77	1.57311	2.00162
78	1.86799	1.68288
79	1.75578	1.61835
80	1.81029	1.89336
81	2.16737	2.1133
82	2.12418	2.00336
83	2.17594	2.17503
84	2.805	2.10566
85	2.54341	2.35314
86	1.70329	2.003
87	1.9084	2.969
88	1.96023	1.90141
89	1.5597	2.15379
90	2.04817	2.0723
91	1.75201	1.96334
92	2.41078	2.04192
93	1.84781	1.89555
94	1.92906	2.08748
95	1.8493	2.29233
96	2.00687	1.8735
97	2.58617	2.60606
98	1.6877	1.68194
99	2.06702	2.28088
100	1.7842	2.35952
101	1.53152	1.91326
102	2.58785	1.9564
103	2.16637	2.37491
104	2.19633	1.83501
105	1.84791	1.96743
106	2.18769	2.05919
107	2.0559	2.27289
108	2.23113	2.29733
109	2.61362	2.58711
110	2.2572	2.25553
111	1.53069	1.72811
112	2.72534	2.277
113	2.54123	2.07456
114	2.37453	2.49191
115	2.40651	2.44974
116	2.2661	2.13293
117	1.97266	2.06965
118	2.69155	1.59068
119	1.82727	1.93165
120	1.9465	2.68839
121	1.79687	1.83009
122	2.75768	2.40024
123	1.82311	2.19749
124	2.59393	2.8039
125	1.96271	2.15568
126	2.09142	2.17622
127	2.8944	2.08267
128	3.18631	2.48376
129	3.0554	2.07591
130	1.72	1.9898
131	1.79359	2.13916
132	2.36337	2.01968
133	2.15046	2.30017
134	2.01679	1.77798
135	2.1794	2.33421
136	2.12765	2.79265
137	1.89617	2.42774
138	1.85353	2.2593
139	3.15075	2.24567
140	1.50885	1.83391
141	1.8009	2.10799
142	2.35638	2.34475
143	2.69928	1.95719
144	2.19659	2.46737
145	2.76221	1.7842
146	1.8691	2.16882
147	3.54492	2.28203
148	2.13714	2.41385
149	2.37897	2.13115
150	1.86874	2.48557
151	2.36487	2.30724
152	1.65117	1.85993
153	2.49036	2.44041
154	1.67155	2.23319
155	1.71731	1.72621
156	1.74231	1.94972
157	2.57017	2.07851
158	1.91305	1.65986
159	1.75478	1.62076
160	1.53888	1.84347
161	1.60293	2.67509
162	2.5328	1.86023
163	2.91525	2.18133
164	2.04224	2.0667
165	2.10451	1.82549
166	2.2995	2.24692
167	2.35812	2.51454
168	1.77898	2.12647
169	1.84532	2.01005
170	3.10363	2.43293
171	2.06181	2.41599
172	2.82024	2.65913
173	2.29266	2.83246
174	2.90047	2.39461
175	2.13323	2.52349
176	2.91345	2.41045
177	1.78668	1.72449
178	1.91164	2.86631
179	2.05741	2.43378
180	1.77191	2.00599
181	1.9898	1.86826
182	1.70089	2.48277
183	2.08293	1.78275
184	2.09048	2.36002
185	2.0616	2.38667
186	3.47212	2.30604
187	2.1751	2.18642
188	2.05353	2.06273
189	2.16882	1.85023
190	1.7988	2.67882
191	2.375	2.73183
192	1.94995	2.12935
193	2.34265	2.45615
194	1.99516	2.4068
195	1.87788	2.59066
196	1.62799	2.66754
197	1.88329	2.26918
198	1.78415	2.20095
199	2.08784	2.16895
200	2.14972	2.24268
201	2.48277	2.23721
202	1.96416	2.15688
203	2.01652	1.87849
204	1.85156	2.19441
205	2.67376	2.44881
206	2.49525	2.3629
207	2.83246	2.35375
208	2.47478	2.25933
209	1.52227	1.86502
210	2.25338	1.62061
211	1.80738	3.10363
212	2.04477	2.29951
213	2.2092	2.55265
214	2.35368	2.28099
215	2.86341	2.3695
216	2.03263	2.08638
217	2.67509	1.60293
218	2.53838	2.15633
219	1.99637	1.83268
220	2.3257	2.48138
221	1.97426	2.54926
222	1.98478	2.0769
223	2.25963	2.19798
224	1.83661	1.88482
225	3.05341	2.14155
226	2.57431	1.90786
227	2.34132	2.55424
228	2.2247	2.17917
229	2.08254	1.89836
230	1.92353	1.90407
231	2.21077	2.0144
232	2.33384	1.95286
233	2.06067	2.03338
234	2.42957	1.82622
235	2.9704	2.24243
236	2.971	2.47962
237	2.67882	2.63557
238	3.16063	2.10993
239	2.007	2.19142
240	1.67362	2.09937
241	3.59576	1.85135
242	1.90584	2.79053
243	2.13587	2.1255
244	2.73166	1.93692
245	2.64017	2.22262
246	3.3226	2.57799
247	2.01191	1.76947
248	2.86199	2.04893
249	1.64229	2.25338
250	2.20095	1.9006
251	1.51259	1.82699
252	1.73421	2.06986
253	2.31717	2.13409
254	1.82577	2.2734
255	2.72179	2.10577
256	3.01266	2.47286
257	1.76947	2.01191
258	1.86219	1.92452
259	1.83628	1.99191
260	2.2746	2.19578
261	1.73643	2.31281
262	2.18719	2.50404
263	2.03811	2.44476
264	2.41021	2.32606
265	1.79686	2.85049
266	2.4182	2.09827
267	2.23743	2.2244
268	2.24066	2.27238
269	1.82775	2.00531
270	1.90334	1.71312
271	2.04917	2.16302
272	2.1062	2.12341
273	2.14642	2.16084
274	2.52191	2.15684
275	1.69495	1.9147
276	1.89081	1.98336
277	1.80263	2.14669
278	3.0828	1.87933
279	1.87484	2.34555
280	2.44584	2.28434
281	3.47235	2.57612
282	2.20684	2.06744
283	1.52594	2.04784
284	1.70885	1.89057
285	2.26097	2.10591
286	1.51984	2.10986
287	1.75277	1.95506
288	2.19668	1.86863
289	2.70187	2.61458
290	2.39184	1.60992
291	2.45574	2.33973
292	1.89394	2.18447
293	1.92016	2.11619
294	1.86123	2.76488
295	1.86294	2.14238
296	1.73497	1.97325
297	1.68785	1.58018
298	2.17718	2.12701
299	2.34731	2.17177
300	1.97262	2.09552
301	1.96161	1.8408
302	1.8328	2.01334
303	2.02363	1.86477
304	3.19322	1.95064
305	1.80642	2.78422
306	1.81121	1.9641
307	2.22394	2.32937
308	3.18705	2.32969
309	1.63255	2.01812
310	2.65855	2.10446
311	1.60153	2.11969
312	1.91514	1.6971
313	1.72449	1.81646
314	1.54147	1.75231
315	1.57271	1.61821
316	1.99232	1.95515
317	1.74767	2.40911
318	2.17452	2.12064
319	2.03891	1.85967
320	1.56295	1.5873
321	2.0349	2.23105
322	1.55234	2.36839
323	2.96461	2.18392
324	2.11564	2.15957
325	1.92845	1.93949
326	1.58018	1.88093
327	1.85769	1.92602
328	1.66382	1.82446
329	2.36399	2.19202
330	1.5873	1.9774
331	1.54557	2.42957
332	2.08641	2.39211
333	2.28279	2.37229
334	2.04853	2.43282
335	2.56093	2.42563
336	1.6444	1.62517
337	1.68099	2.37046
338	2.09658	2.19235
339	2.36404	2.30838
340	1.95474	1.86123
341	1.80533	1.91868
342	1.55554	2.00555
343	1.674	2.16704
344	1.7868	3.0828
345	1.64692	1.83009
346	1.51526	1.96549
347	2.3965	2.84753
348	2.04784	1.65639
349	1.59	2.77828
350	2.01403	2.24822
351	1.98264	2.12256
352	1.94138	2.42092
353	1.92048	2.44796
354	1.97266	2.18853
355	2.26018	2.03658
356	2.98101	2.55051
357	1.93342	2.30984
358	1.9644	2.26836
359	2.4284	2.42642
360	1.62977	1.65537
361	2.07706	2.19751
362	2.04587	1.90129
363	2.2693	2.7149
364	2.02763	1.74609
365	1.9008	1.96923
366	1.82699	1.51259
367	2.10522	1.98569
368	2.4559	1.73822
369	1.84848	2.11197
370	2.95845	2.0856
371	2.72952	2.0024
372	1.59646	1.96549
373	3.26988	2.59608
374	3.13824	2.30231
375	3.32725	1.97556
376	3.6044	2.64722
377	1.90783	2.72144
378	1.71747	2.50272
379	1.66678	2.08321
380	1.98927	1.83682
381	2.07487	1.99686
382	2.42642	2.38285
383	2.44328	1.7824
384	1.56421	1.89692
385	2.02278	2.65713
386	2.02705	2.29636
387	2.64722	2.72781
388	1.74137	2.64104
389	2.30275	1.97937
390	1.6178	1.90944
391	2.13252	2.09378
392	1.68543	1.94266
393	2.64104	1.88874
394	2.15027	1.78685
395	1.6154	1.88437
396	2.09568	2.56188
397	2.43789	2.50014
398	2.13217	1.98927
399	3.13015	2.25967
400	2.17677	2.23744
401	2.49281	1.66678
402	1.78685	2.09905
403	2.10953	2.45897
404	1.98637	2.12103
405	2.22672	1.6971
406	1.87658	1.91312
407	2.10347	2.17652
408	1.55957	1.5792
409	1.91565	2.07706
410	1.9693	2.02763
411	2.41595	2.32852
412	1.52931	2.38718
413	2.38718	1.76067
414	3.40391	1.925
415	1.5792	1.55957
416	2.17448	1.91714
417	1.92267	1.61563
418	1.6971	1.94951
419	2.07509	1.79753
420	2.01435	1.92273
421	1.65973	1.7471
422	2.73159	2.26274
423	1.60226	2.12355
424	1.92273	2.01435
425	2.76259	3.13015
426	1.65329	2.00262
427	1.72288	1.6154
428	2.12227	2.33995
429	1.85631	2.05962
430	1.84453	1.94275
431	1.60764	1.55131
432	1.99281	1.83868
433	1.73602	1.97891
434	2.24266	2.03597
435	1.55131	1.60764
436	1.75814	2.36357
437	1.78328	1.59965
438	2.17652	1.84153
439	2.53494	1.61986
440	1.70667	1.72599
441	1.97296	1.78249
442	2.21564	1.92494
443	1.59965	1.78328
444	2.21648	2.17448
445	1.57154	1.7912
446	2.33995	1.9402
447	1.78249	1.97296
448	1.75488	1.70667
449	1.61986	2.53494
450	1.57959	2.17652
451	1.69247	1.5293
452	1.5293	1.69247

## Sheet: Figure 4D
ROI_id	720/670 ratio	nearest_mean_720/670 ratios
1	1.60124	1.84473
2	1.84473	1.60124
3	1.52387	1.68947
4	1.68947	1.52387
5	1.58978	1.77724
6	1.66579	1.68435
7	1.60999	1.72655
8	1.63069	1.6875
9	1.55813	1.92379
10	1.82232	2.22276
11	1.74592	1.6995
12	1.92379	1.6235
13	2.31874	2.35343
14	1.67836	1.69444
15	2.21134	2.60336
16	1.75677	1.69545
17	1.69002	1.68893
18	1.76589	1.69956
19	3.38395	2.14507
20	1.68607	1.73367
21	1.80773	1.74953
22	1.74534	2.28334
23	1.50412	1.73911
24	1.71067	1.748
25	1.76756	1.60739
26	2.33575	1.99288
27	1.99288	2.32225
28	2.18767	2.1664
29	1.90801	1.73885
30	1.73885	1.90801
31	2.00837	1.89251
32	1.96245	2.42556
33	2.02936	1.89288
34	1.75566	2.01887
35	1.55294	2.06977
36	2.1495	2.16027
37	1.9065	2.25115
38	1.78845	1.94506
39	1.92108	1.87275
40	2.10296	2.19801
41	1.77317	1.94888
42	1.96391	1.7033
43	1.95608	2.33586
44	2.18613	1.8916
45	2.00216	2.29608
46	2.05662	1.77295
47	1.50075	2.08887
48	1.61096	1.96391
49	2.43088	2.05256
50	3.10865	2.03422
51	1.60909	2.07896
52	2.09671	2.39757
53	2.03947	2.41666
54	1.97622	1.94733
55	1.90932	2.06443
56	2.1013	1.84766
57	1.94281	2.55638
58	1.81403	2.04645
59	1.87267	2.13399
60	2.501	2.04028
61	1.83867	1.84427
62	3.0581	2.44038
63	2.00218	1.81403
64	1.93137	1.6866
65	2.24215	2.07542
66	1.68131	1.72647
67	1.98467	1.87836
68	2.70295	1.89441
69	1.76148	1.90068
70	1.85271	1.99254
71	2.21156	1.83663
72	1.78302	1.80564
73	2.28334	1.99851
74	1.90848	1.99558
75	2.03616	2.02379
76	2.1074	2.38119
77	1.72259	1.85358
78	1.8094	1.88593
79	3.15583	2.23278
80	2.44038	2.5017
81	1.79234	2.15406
82	1.7279	2.21942
83	1.98624	1.92593
84	2.0674	1.80391
85	1.52792	2.06858
86	2.06977	1.74057
87	1.79565	1.84575
88	2.04461	2.18326
89	1.70608	1.73279
90	1.95766	2.03876
91	2.05322	2.24215
92	1.92752	1.78791
93	3.26488	1.85829
94	2.20072	1.92679
95	1.86438	1.98624
96	1.7696	1.97232
97	1.96363	1.95827
98	2.26216	1.65034
99	2.19337	2.19278
100	2.52934	2.191
101	2.28875	1.93635
102	1.67426	2.1215
103	2.25654	1.79924
104	2.18245	1.94716
105	1.99161	1.89975
106	1.94561	2.30158
107	1.70671	1.85611
108	1.83692	2.17739
109	1.97232	2.35482
110	2.55398	2.03921
111	1.64239	2.13643
112	2.35223	1.95892
113	1.62228	1.72661
114	1.87632	2.01091
115	1.75461	2.06417
116	2.00887	2.13983
117	1.79944	2.0954
118	2.30876	1.87553
119	1.5392	2.10819
120	2.02094	2.03099
121	1.50676	2.09482
122	1.76321	1.71306
123	1.93035	1.96936
124	2.5786	2.0819
125	2.08364	2.42211
126	1.83663	2.41337
127	2.13873	1.93289
128	1.84344	1.67679
129	1.80293	2.03771
130	1.50317	1.92701
131	2.09174	1.95955
132	2.21972	2.77609
133	1.92845	1.94583
134	2.99152	2.38369
135	1.93663	1.89941
136	2.0858	1.94262
137	2.13405	2.0918
138	1.68071	1.71637
139	1.73463	1.71955
140	2.7832	2.17517
141	2.68374	2.19647
142	1.72989	1.81954
143	2.07105	2.01121
144	2.07266	1.70597
145	2.20706	1.79628
146	1.87337	2.30863
147	1.60857	1.76321
148	3.35876	2.10165
149	2.12036	1.85219
150	2.07739	1.9197
151	1.72861	1.93852
152	1.78337	1.72259
153	2.00492	1.94736
154	2.30863	1.97135
155	1.68478	2.33939
156	1.76292	2.52003
157	1.6962	2.53348
158	1.97347	1.91335
159	1.70822	2.13807
160	1.70526	2.1186
161	1.69191	2.04819
162	1.53772	1.73222
163	1.70839	1.70767
164	1.86158	2.3288
165	2.12981	2.18161
166	1.62513	1.86369
167	1.85286	1.87242
168	1.78238	1.75549
169	2.28376	2.09021
170	2.50552	2.05211
171	1.82264	1.846
172	1.50485	1.68014
173	2.01462	2.13345
174	2.13819	1.92128
175	1.61586	2.08997
176	1.72548	2.05311
177	1.80407	2.17967
178	2.70248	1.90549
179	2.2983	2.50552
180	2.93783	2.12981
181	2.77609	1.92929
182	1.51685	1.50485
183	1.79413	1.95569
184	1.98655	1.79413
185	2.10057	2.13216
186	1.51082	1.64277
187	1.76242	2.05913
188	1.87242	2.2683
189	1.82038	1.81126
190	2.00016	1.89311
191	2.05913	1.76242
192	1.99597	2.24503
193	1.63563	1.87284
194	1.52781	1.73718
195	2.1282	1.86701
196	2.05175	1.87203
197	2.60034	1.79964
198	1.74233	1.96616
199	1.80029	2.06418
200	2.17325	2.09515
201	2.12842	1.62309
202	1.51933	2.34015
203	2.07995	2.05984
204	1.63885	2.77609
205	1.75452	1.83832
206	1.62309	1.86781
207	2.69969	2.1861
208	2.18977	2.41946
209	1.79036	2.21575
210	1.71156	1.67979
211	2.76831	2.22661
212	1.67285	1.59155
213	1.59155	1.64797
214	1.82712	1.62821
215	1.62821	1.82712
216	1.88627	1.77244
217	1.84746	3.13762
218	1.88346	1.62309
219	3.13762	1.84746
220	1.67979	1.71156
221	2.10863	1.61201
222	1.61201	2.10863
