# Supplementary material for: Recording γ-secretase activity in living mouse brains
Source: eLife. 2024 Oct 3;13:RP96848. doi: 10.7554/eLife.96848 (PMC11449482; doi:10.7554/eLife.96848)
Supplement: Figure 5—source data 1. [file elife-96848-fig5-data1.xlsx]

## Sheet: Figure 5A
ROI_id	720/670 ratio	nearest_mean_720/670 ratios
1	1.57635	1.65733
2	1.72317	1.66144
3	1.54382	1.79151
4	1.69982	1.75316
5	1.56973	1.78632
6	1.58487	1.71119
7	1.55007	1.65137
8	1.56797	1.81626
9	1.71303	1.90962
10	2.42721	1.74956
11	1.71569	1.74448
12	1.96455	1.69884
13	1.53157	1.6493
14	1.57241	1.75077
15	1.72205	1.71165
16	1.71314	1.71427
17	2.11598	1.84058
18	1.74719	1.71479
19	2.18009	1.79439
20	1.78354	1.75887
21	1.6511	1.75996
22	1.53799	1.78195
23	1.67064	1.85545
24	1.52457	1.66663
25	2.12453	1.66527
26	1.85775	1.59999
27	1.57206	1.6149
28	1.7436	1.75795
29	1.75933	1.63433
30	1.63164	1.63559
31	1.7167	2.27793
32	1.74302	1.77673
33	1.59291	1.71149
34	1.5716	1.62693
35	1.54552	1.82622
36	1.61815	1.7237
37	1.50811	1.63963
38	1.77778	2.1348
39	1.61002	1.83647
40	1.54533	1.80065
41	1.61183	1.83825
42	1.78724	1.89833
43	1.56938	1.86537
44	1.65169	1.95339
45	1.68608	1.60585
46	1.60373	1.58757
47	1.61111	1.89437
48	1.80094	1.84852
49	1.67349	1.95896
50	2.63841	1.74489
51	1.61526	2.09077
52	2.37122	1.78736
53	1.56177	1.63071
54	1.88329	1.60545
55	1.83711	2.02549
56	1.8605	2.24046
57	1.91153	1.68233
58	1.80203	1.84082
59	1.54608	1.88193
60	2.55776	1.59629
61	1.71079	1.8426
62	3.07929	1.80265
63	1.56129	1.70034
64	1.50448	1.77706
65	1.56377	2.07783
66	2.43262	1.96302
67	2.23946	1.99224
68	2.12367	2.0617
69	2.07185	2.11905
70	1.78789	1.931
71	2.59958	2.04435
72	1.60012	1.91478
73	3.08899	1.61435
74	2.19592	2.07109
75	1.62502	1.93211
76	1.60356	1.9364
77	1.54463	2.22449
78	1.94472	1.71633
79	1.92344	1.76789
80	2.19586	1.6651
81	1.82298	1.69984
82	2.48072	1.94724
83	1.94828	1.76865
84	1.84665	2.08159
85	1.55806	2.1409
86	1.7678	2.015
87	1.94876	1.86493
88	1.54813	1.9388
89	1.65136	1.74805
90	1.6017	1.69745
91	1.79278	1.57978
92	1.6575	1.76601
93	2.41276	2.14919
94	1.7112	2.03625
95	2.26446	1.88239
96	1.62891	1.78165
97	1.57632	1.93083
98	1.61485	1.96302
99	1.6982	1.8002
100	1.67682	1.76623
101	1.97862	2.12602
102	1.63609	2.00786
103	2.23665	1.99179
104	2.73831	1.92366
105	2.14239	2.05885
106	1.69615	1.78392
107	2.03717	1.74508
108	1.76645	1.7438
109	2.00924	1.96677
110	2.41809	2.00844
111	1.83743	1.90905
112	2.19564	1.96895
113	1.68625	1.80399
114	1.64463	2.00797
115	1.95179	1.70716
116	2.03573	1.85425
117	1.79302	2.15403
118	1.65451	1.93911
119	1.78548	2.06002
120	2.22063	1.99693
121	1.70758	1.89546
122	1.54169	1.75655
123	1.75447	1.92369
124	1.58308	1.77729
125	1.55021	1.72228
126	2.00037	1.71664
127	1.68513	1.63594
128	1.55938	1.86303
129	1.61146	1.64877
130	1.66966	1.73537
131	1.91356	1.60706
132	1.54796	1.90276
133	1.62935	1.87589
134	1.98191	1.82588
135	2.47878	2.19041
136	1.66834	1.81611
137	1.62641	1.78951
138	1.74102	1.87609
139	1.58627	1.71196
140	1.70256	2.02496
141	1.5557	1.88523
142	1.60132	1.75268
143	2.17834	1.7071
144	1.90336	1.7897
145	2.19511	1.8622
146	1.589	1.86274
147	1.52685	2.0622
148	2.9181	1.61625
149	1.62948	2.08465
150	1.67204	1.66974
151	1.51006	1.77726
152	1.56394	1.69047
153	2.18687	1.81174
154	1.56984	1.72042
155	1.8153	1.6367
156	1.54844	1.79011
157	1.57175	1.70426
158	1.53318	1.72636
159	1.66314	1.61513
160	2.22579	1.72743
161	1.50013	1.77789
162	1.53793	1.9364
163	1.5888	1.90369
164	1.88926	2.19556
165	1.74218	2.03616
166	1.52151	1.89207
167	1.72442	1.66922
168	1.76565	1.70901
169	1.76559	1.75831
170	1.55712	1.77951
171	1.69778	1.76628
172	1.81223	2.17354
173	1.91811	2.2496
174	2.93721	1.98597
175	1.61316	1.69325
176	1.50463	1.81677
177	2.07782	1.93327
178	2.77938	2.05517
179	1.92416	1.96199
180	1.77839	1.75467
181	1.75252	1.93161
182	1.68802	1.68266
183	1.71359	2.05874
184	1.51176	1.92099
185	1.50443	1.71181
186	1.72624	1.85656
187	1.53423	1.59307
188	1.92854	1.9793
189	1.70845	1.86473
190	1.60305	1.67459
191	1.80416	1.65276
192	3.13559	1.61689
193	1.52892	1.60635
194	1.62029	1.9361
195	1.85375	1.73169
196	1.53476	1.71903
197	2.329	1.6554
198	1.54526	1.73184
199	1.60523	1.76592
200	1.88525	1.72578
201	1.81894	1.71588
202	1.54388	1.66873
203	2.06297	1.56584
204	1.70705	1.72031
205	1.56706	1.59504
206	1.63733	1.88969
207	1.63501	1.70054
208	1.56876	1.61477
209	1.82849	1.70162
210	1.71392	1.80881
211	1.63998	1.90442
212	1.71907	1.68373
213	1.68175	2.04304
214	1.61074	1.92822
215	2.26538	2.08215
216	1.62219	1.61194
217	1.50851	1.76561
218	1.53529	1.74676
219	2.46891	1.72338
220	1.54545	1.65945
221	1.65178	1.78974
222	1.52281	1.94149
223	1.68066	1.90992
224	1.57415	2.02305

## Sheet: Figure 5B
ROI_id	720/670 ratio	nearest_mean_720/670 ratios
1	1.59337	1.58539
2	1.55658	1.62451
3	1.57034	1.62175
4	1.62389	1.61104
5	1.56434	1.62295
6	1.55232	1.89816
7	1.59073	1.57663
8	1.61094	1.61363
9	1.60406	2.0247
10	1.64844	1.69715
11	1.68159	1.68079
12	1.75301	1.62499
13	1.64015	1.69881
14	1.62631	1.56128
15	1.55864	1.68044
16	1.5332	1.89944
17	1.85237	1.61401
18	1.63977	1.56639
19	1.59612	1.67287
20	1.56056	1.63989
21	1.59935	1.65754
22	1.59297	1.65882
23	1.57048	1.73807
24	1.57216	1.58041
25	1.54448	1.63061
26	1.54091	1.70262
27	1.61436	1.61663
28	1.56251	1.62701
29	1.8177	1.63391
30	1.9343	1.73191
31	1.53732	1.83119
32	1.60642	2.02699
33	1.57319	1.63656
34	1.5559	1.64002
35	1.94418	1.56421
36	1.62377	2.11534
37	1.55037	1.64285
38	1.59505	1.63392
39	1.60813	1.86668
40	1.54594	1.61963
41	1.57131	1.78174
42	1.54844	1.87886
43	1.55098	1.62202
44	1.58786	1.78495
45	1.54656	1.76776
46	1.89912	1.81805
47	1.76092	1.77176
48	2.51773	1.71676
49	1.90729	1.87485
50	1.5026	1.79549
51	1.59111	1.86166
52	2.21957	1.60967
53	1.66406	1.71329
54	1.6929	2.01406
55	1.86311	1.69637
56	2.09234	1.87206
57	1.59236	1.90021
58	1.71135	1.65176
59	1.51273	1.96823
60	1.54357	1.99706
61	1.5917	1.82083
62	1.5404	1.90972
63	2.80716	1.66899
64	1.61012	1.58022
65	3.11028	1.73384
66	2.93713	1.87861
67	1.83818	2.1782
68	1.65498	1.88191
69	1.58748	1.58501
70	1.93633	1.97503
71	1.63841	1.90479
72	1.55759	1.59099
73	2.27679	1.8945
74	1.5134	1.78156
75	1.86981	2.17187
76	2.74129	1.66617
77	1.51	1.61262
78	1.5908	1.63793
79	2.12082	1.72785
80	2.27431	1.67077
81	1.58837	1.73066
82	1.5679	1.79012
83	1.50763	1.5886
84	1.65791	2.01597
85	1.65902	1.82288
86	1.65364	1.55939
87	1.52074	1.96989
88	1.66783	1.60497
89	1.64361	1.94987
90	1.50456	1.63762
91	1.51876	1.75395
92	1.70836	1.91647
93	1.71043	1.83862
94	1.53854	1.69112
95	1.59423	1.74688
96	1.54424	1.81726
97	2.21104	1.87899
98	1.85212	1.81028
99	1.50671	1.85018
100	1.55729	2.02289
101	3.29111	1.65758
102	1.74733	1.64534
103	1.67162	1.8011
104	1.56212	2.00877
105	1.62206	1.8017
106	3.06664	1.70787
107	1.64835	1.82185
108	1.58173	1.6595
109	1.64946	1.74265
110	2.22797	1.71442
111	1.55392	1.8969
112	1.82896	1.8122
113	1.98904	1.85145
114	1.66179	1.97009
115	2.46452	1.80541
116	2.78075	1.76366
117	2.01481	1.98198
118	1.6291	1.66723
119	2.54421	1.86815
120	1.60946	1.73676
121	1.64345	2.0105
122	1.6941	1.76533
123	1.7109	1.95439
124	1.84306	1.90413
125	1.52375	1.7707
126	2.25969	1.82081
127	1.53045	1.747
128	2.02644	2.04769
129	2.04622	1.89509
130	1.55579	2.12687
131	2.03769	2.10542
132	1.66325	1.89172
133	2.00442	1.88114
134	1.72363	1.84985
135	2.3836	1.95258
136	1.5237	2.02871
137	1.82359	2.11114
138	2.10847	1.63055
139	1.71166	2.0831
140	2.14003	1.92655
141	1.66133	1.87089

## Sheet: Figure 5C
ROI_id	720/670 ratio	nearest_mean_720/670 ratios
1	1.72317	1.5716
2	1.54382	1.69982
3	1.69982	1.54382
4	1.58487	1.69454
5	1.55007	1.78068
6	1.56797	1.81626
7	1.71303	1.90962
8	2.42721	1.74956
9	1.71569	1.58858
10	1.96455	1.65772
11	1.53157	1.7436
12	1.57241	1.78569
13	1.72205	1.66168
14	1.71314	1.66495
15	2.11598	1.84058
16	1.74719	1.72686
17	2.18009	1.77377
18	1.78354	1.84383
19	1.6511	1.81929
20	1.53799	1.78062
21	1.67064	1.84408
22	1.52457	1.69027
23	2.12453	1.66527
24	1.85775	1.52457
25	1.57206	1.56129
26	1.7436	1.53854
27	1.75933	1.58364
28	1.63164	1.64849
29	1.7167	1.81914
30	1.74302	1.753
31	1.5716	1.57438
32	1.54552	1.96217
33	1.61815	1.7237
34	1.50811	1.61874
35	1.77778	2.21883
36	1.61002	1.54533
37	1.54533	1.61002
38	1.78724	1.85678
39	1.56938	1.80272
40	1.65169	1.95339
41	1.68608	1.56177
42	1.61111	1.83897
43	1.80094	1.86476
44	2.63841	1.68461
45	1.61526	2.27966
46	2.37122	1.92175
47	1.56177	1.63071
48	1.88329	1.56177
49	1.83711	1.76294
50	1.8605	2.03075
51	1.91153	1.61815
52	1.80203	1.9282
53	1.54608	1.70107
54	1.71079	1.78789
55	3.07929	1.78818
56	1.56129	1.60049
57	1.50448	1.54716
58	1.56377	2.16959
59	2.43262	2.04998
60	2.23946	2.43262
61	2.12367	1.80824
62	2.07185	1.99891
63	1.78789	1.68034
64	2.59958	2.10108
65	1.60012	1.99551
66	3.08899	1.59558
67	2.19592	2.01832
68	1.62502	1.98739
69	1.60356	1.62502
70	1.54463	2.13072
71	1.94472	1.75557
72	1.92344	1.88229
73	2.19586	1.83711
74	1.82298	1.71297
75	2.48072	2.07202
76	1.94828	1.83743
77	1.84665	1.77589
78	1.55806	2.43202
79	1.7678	2.03717
80	1.94876	1.6982
81	1.65136	1.66848
82	1.6017	1.64095
83	1.79278	1.59389
84	1.6575	1.81072
85	2.41276	2.47878
86	1.7112	1.89887
87	2.26446	1.88239
88	1.62891	1.56129
89	1.57632	2.16554
90	1.61485	2.33265
91	1.6982	1.93803
92	1.67682	1.78324
93	1.97862	1.91647
94	2.23665	1.85893
95	2.73831	1.83243
96	2.14239	1.7112
97	1.69615	1.68112
98	2.03717	1.7678
99	1.76645	1.77118
100	2.00924	2.15887
101	2.41809	2.2287
102	1.83743	2.08446
103	2.19564	1.52685
104	1.68625	1.94418
105	1.64463	2.00797
106	1.95179	1.71653
107	2.03573	2.00924
108	1.79302	1.75447
109	1.65451	1.74724
110	1.78548	2.73831
111	2.22063	1.83743
112	1.70758	1.68128
113	1.54169	1.63699
114	1.75447	1.92369
115	1.58308	1.82298
116	1.55021	1.61146
117	2.00037	1.95179
118	1.68513	1.66314
119	1.55938	1.60132
120	1.61146	1.68914
121	1.66966	1.6575
122	1.91356	1.60706
123	1.54796	1.64893
124	1.62935	1.92331
125	2.47878	2.41542
126	1.66834	1.6017
127	1.62641	1.78951
128	1.74102	1.5386
129	1.58627	1.7483
130	1.70256	2.37377
131	1.5557	1.63126
132	1.60132	1.86886
133	2.17834	1.58558
134	1.90336	1.62641
135	2.19511	1.53793
136	1.589	2.04546
137	1.52685	2.21072
138	2.9181	1.61625
139	1.62948	2.03197
140	1.51006	1.877
141	1.56394	1.83961
142	2.18687	1.69778
143	1.56984	2.17834
144	1.54844	1.62641
145	1.57175	1.53318
146	1.53318	1.61745
147	1.66314	1.60915
148	2.22579	1.52685
149	1.53793	2.19511
150	1.5888	1.90369
151	1.88926	2.42766
152	1.52151	1.64836
153	1.72442	1.61146
154	1.76565	1.537
155	1.69778	1.84932
156	1.81223	2.07782
157	1.91811	2.32986
158	2.93721	1.90369
159	1.50463	1.62641
160	2.07782	1.86819
161	2.77938	1.81585
162	1.92416	2.07782
163	1.77839	1.81779
164	1.75252	1.5888
165	1.71359	2.20868
166	1.51176	1.70311
167	1.92854	1.74599
168	1.70845	2.32367
169	3.13559	1.70845
170	1.85375	1.72697
171	1.53476	1.69863
172	1.60523	1.81894
173	1.81894	1.70026
174	1.54388	1.64307
175	1.70705	1.79866
176	1.56706	1.63265
177	1.63733	2.12476
178	1.63501	1.7397
179	1.56876	1.62392
180	1.82849	1.53734
181	1.63998	2.05312
182	1.71907	1.58198
183	1.68175	1.61074
184	1.61074	1.68175
185	2.26538	2.05312
186	1.62219	1.54545
187	1.50851	1.69863
188	2.46891	1.84756
189	1.54545	1.62219
190	1.52281	1.68066
191	1.68066	1.52281

## Sheet: Figure 5D
ROI_id	720/670 ratio	nearest_mean_720/670 ratios
1	1.55658	1.59972
2	1.57034	1.59972
3	1.62389	1.57555
4	1.56434	1.59044
5	1.55232	1.59073
6	1.59073	1.55232
7	1.61094	1.57879
8	1.64844	1.69159
9	1.68159	1.6443
10	1.75301	1.61574
11	1.64015	1.69881
12	1.55864	1.68044
13	1.85237	1.62737
14	1.59612	1.5596
15	1.56056	1.58257
16	1.59935	1.68179
17	1.59297	1.61044
18	1.57048	1.63455
19	1.57216	1.56557
20	1.54448	1.57249
21	1.54091	1.72937
22	1.61436	1.55502
23	1.56251	1.62701
24	1.9343	1.76092
25	1.53732	1.89638
26	1.60642	2.07075
27	1.57319	1.63656
28	1.5559	1.6657
29	1.94418	1.56863
30	1.62377	1.91076
31	1.55037	1.66708
32	1.59505	1.63392
33	1.60813	2.01626
34	1.54594	1.59505
35	1.57131	1.5026
36	1.58786	1.81945
37	1.54656	1.8401
38	1.76092	1.9343
39	2.51773	1.92015
40	1.90729	1.95846
41	1.5026	2.1563
42	2.21957	1.64711
43	1.6929	1.5917
44	1.86311	1.77433
45	2.09234	1.56721
46	1.59236	1.97758
47	1.71135	1.65379
48	1.51273	1.73995
49	1.54357	2.12873
50	1.5917	1.9836
51	1.61012	1.58371
52	3.11028	1.84138
53	2.93713	1.97704
54	1.83818	2.09828
55	1.65498	1.95551
56	1.58748	1.58669
57	1.93633	1.52815
58	1.55759	1.56328
59	2.27679	3.11028
60	1.86981	2.0854
61	2.74129	1.5026
62	1.51	1.58386
63	1.5908	1.50456
64	2.27431	1.5917
65	1.50763	1.65364
66	1.65902	1.86981
67	1.65364	1.55887
68	1.52074	2.49974
69	1.66783	1.63184
70	1.64361	1.63991
71	1.50456	1.66239
72	1.51876	1.59423
73	1.70836	1.52074
74	1.71043	1.85212
75	1.59423	1.51876
76	1.54424	1.62206
77	1.85212	1.71043
78	1.50671	1.64835
79	1.55729	1.60855
80	3.29111	1.52074
81	1.74733	1.60534
82	1.67162	1.64946
83	1.56212	1.95821
84	1.62206	1.54424
85	3.06664	1.56212
86	1.64835	1.50671
87	1.58173	1.82896
88	1.64946	1.67162
89	1.55392	1.56212
90	1.82896	1.58173
91	2.01481	2.54421
92	2.54421	2.01481
93	1.7109	1.55579
94	1.84306	2.25969
95	2.25969	1.84306
96	2.02644	2.03769
97	1.55579	1.7109
98	2.03769	2.20502
99	2.3836	2.03769
