# Supplementary figures and images for: Recording γ-secretase activity in living mouse brains
Source: eLife journal article supplement (doi:10.7554/elife.96848), 2024-04-26

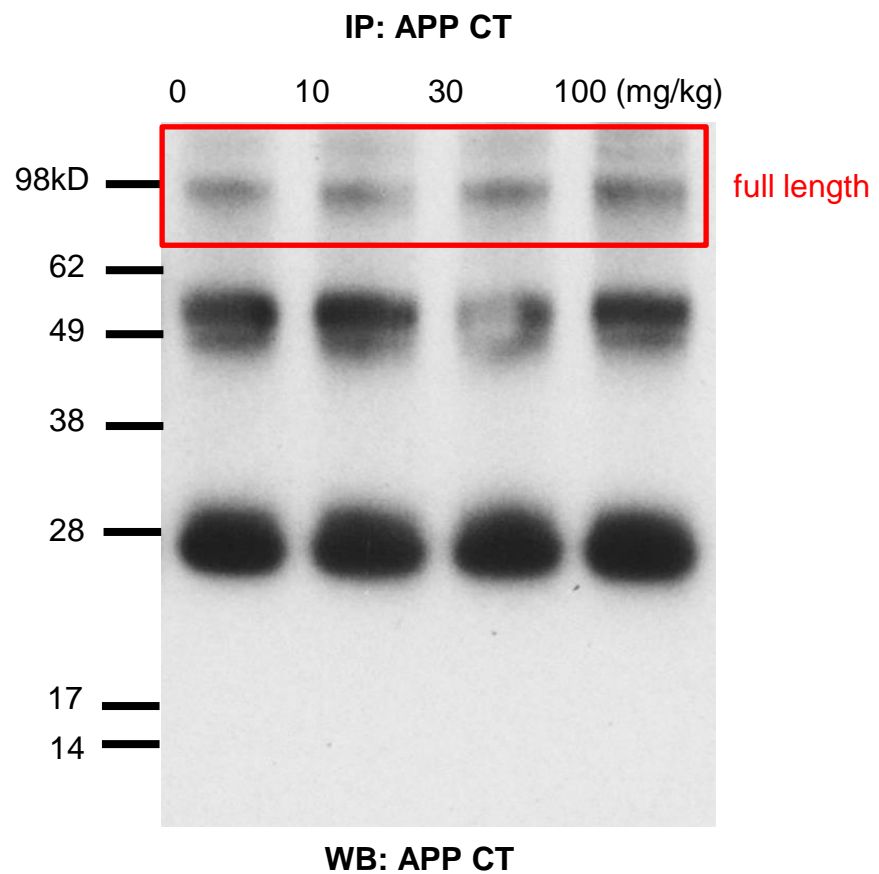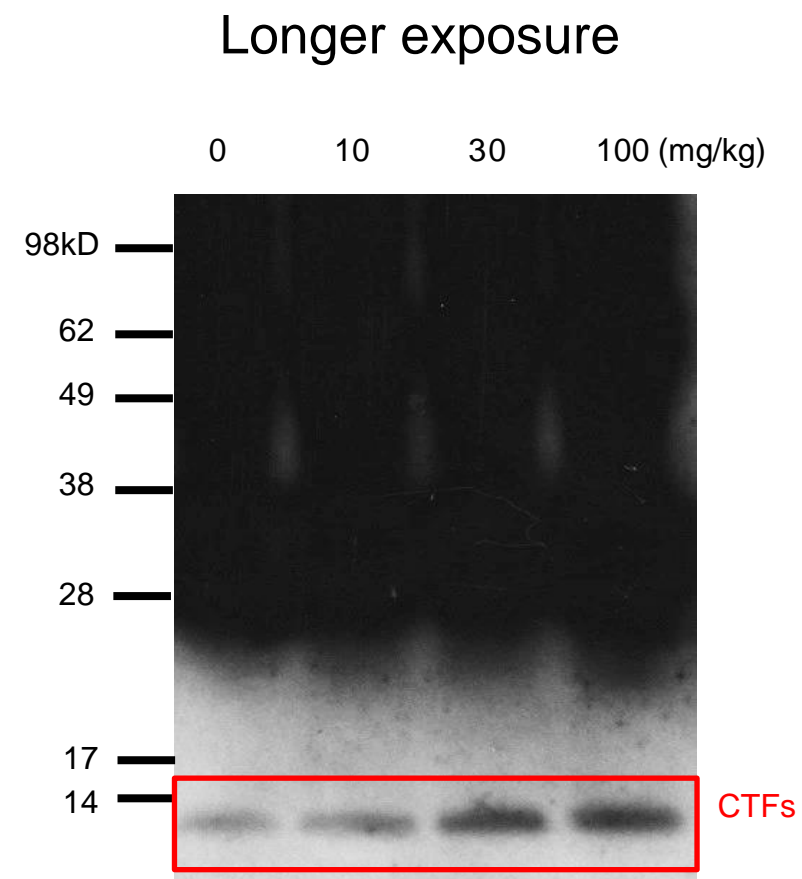

Supplement: fig2-figsupp2-data1 [file elife-96848-fig2-figsupp2-data1-v1.zip]
